# The effects of age on resting-state BOLD signal variability is explained by cardiovascular and cerebrovascular factors

KAMEN A. TSVETANOV<sup>1,2,\*</sup>, RICHARD N.A. HENSON<sup>3,4</sup>, P. SIMON JONES<sup>2</sup>, HENK-JAN MUTSAERTS<sup>5</sup>, DELIA FUHRMANN<sup>3</sup>, LORRAINE K. TYLER<sup>2</sup>, CAM-CAN<sup>1,2</sup> AND JAMES B. ROWE<sup>2,3</sup>

\* Corresponding author ([kat35@cam.ac.uk](mailto:kat35@cam.ac.uk), +44 1223 766 556)

<sup>1</sup> Department of Clinical Neurosciences, University of Cambridge, Cambridge, UK

<sup>2</sup> Centre for Speech, Language and the Brain, Department of Psychology, University of Cambridge, Cambridge, UK

<sup>3</sup> Medical Research Council Cognition and Brain Sciences Unit, Cambridge, UK

<sup>4</sup> Department of Psychiatry, University of Cambridge, Cambridge, UK

<sup>5</sup> Department of Radiology and nuclear medicine, Amsterdam University Medical Center, Amsterdam, The Netherlands

---

**Summary:** Accurate identification of brain function is necessary to understand neurocognitive ageing, and thereby promote health and well-being. Many studies of neurocognitive aging have investigated brain function with the blood-oxygen level-dependent (BOLD) signal measured by functional magnetic resonance imaging. However, the BOLD signal is a composite of neural and vascular signals, which are differentially affected by aging. It is therefore essential to distinguish the age effects on vascular *versus* neural function. The BOLD signal variability at rest (known as resting state fluctuation amplitude, RSFA), is a safe, scalable and robust means to calibrate vascular responsivity, as an alternative to breath-holding and hypercapnia. However, the use of RSFA for normalization of BOLD imaging assumes that age differences in RSFA reflecting only vascular factors, rather than age-related differences in neural function (activity) or neuronal loss (atrophy). Previous studies indicate that two vascular factors, cardiovascular health and cerebrovascular function, are insufficient when used alone to fully explain age-related differences in RSFA. It remains possible that their joint consideration is required to fully capture age differences in RSFA. We tested the hypothesis that RSFA no longer varies with age after adjusting for a combination of cardiovascular and cerebrovascular measures. We also tested the hypothesis that RSFA variation with age is not associated with atrophy. We used data from the population-based, lifespan Cam-CAN cohort. After controlling for cardiovascular and cerebrovascular estimates alone, the residual variance in RSFA across individuals was significantly associated with age. However, when controlling for both cardiovascular and cerebrovascular estimates, the variance in RSFA was no longer associated with age. Grey matter volumes did not explain age-differences in RSFA, after controlling for cardiovascular health. The results were consistent between voxel-level analysis and independent component analysis. Our findings indicate that cardiovascular and cerebrovascular signals are together sufficient predictors of age differences in RSFA. We suggest that RSFA can be used to separate vascular from neuronal factors, to characterise neurocognitive aging. We discuss the implications and make recommendations for the use of RSFA in the research of aging.

**Keywords (up to five):** *ageing, functional magnetic resonance imaging (fMRI), individual differences, cerebral vascular reactivity*

---

## 1 1. Introduction

2           The worldwide population is rapidly aging with an increasing number and proportion of older  
3 adults across the globe (Beard et al., 2016). Considering the cognitive decline and increasing burden of  
4 dementia in aging societies, there is a pressing need to understand the neurobiology of cognitive aging.  
5 This will inform efforts to maintain mental wellbeing into late life, allowing people to work and live  
6 independently for longer. Research in cognitive neuroscience of aging has used blood-oxygen level-  
7 dependent (BOLD) signal measured by functional magnetic resonance imaging (fMRI) as one of the  
8 standard ways to examine the neural mechanisms of cognition. However, the BOLD signal measures  
9 the activity of neurons indirectly through changes in regional blood flow, volume and oxygenation. This  
10 makes BOLD a complex convolution of neural and vascular signals, which are differentially affected by  
11 aging (Logothetis, 2008). Without careful correction for age differences in vascular health, differences  
12 in fMRI signals can be erroneously attributed to neuronal differences (Liu et al., 2013; Tsvetanov et al.,  
13 2015) and their behavioural relevance overstated (Geerligs et al., 2017; Geerligs and Tsvetanov, 2016;  
14 Tsvetanov et al., 2016).

15           It is possible to control for vascular differences in fMRI signal using additional baseline  
16 measures of cerebrovascular reactivity, including CO<sub>2</sub>-inhalation-induced hypercapnia (Liu et al., 2019),  
17 breath-hold-induced hypercapnia (Handwerker et al., 2007; Mayhew et al., 2010; Riecker et al., 2003;  
18 Thomason et al., 2007, 2005), hyperventilation-induced hypocapnia (Bright et al., 2009; Krainik et al.,  
19 2005), and cerebral blood flow (CBF) or venous oxygenation measures (Liau and Liu, 2009; Lu et al.,  
20 2010; Restom et al., 2007). However, such methods have not been widely used, in part to  
21 impracticalities in large-scale studies, and poor tolerance by older adults (for a review see Tsvetanov et  
22 al., 2020). Additionally, a hypercapnic challenge may not be neuronally neutral, given participants'  
23 awareness of the aversive challenge, which may differ with age (Hall et al., 2011). Breath-hold  
24 compliance may also decrease with age (Jahanian et al., 2017). Such biases affect data quality and

25 reliability measures (Magon et al., 2009), highlighting the advantage of non-invasive and “task-free”  
26 estimates of vascular components in the BOLD time series.

27         The BOLD signal variability in a resting state (“task-free”) is one such estimate and is also known  
28 as resting state fluctuation amplitudes (RSFA) (for a review see Tsvetanov et al., 2020). It has been  
29 proposed as a safe, scalable and robust cerebrovascular reactivity mapping technique (Golestani et al.,  
30 2016; Jahanian et al., 2014; Kannurpatti and Biswal, 2008; P. Liu et al., 2017). The use of RSFA as a  
31 normalization method for BOLD follows the assumption that age differences in RSFA reflect only  
32 vascular factors, rather than age-related differences in neural function or neuronal loss (atrophy).  
33 Fluctuations in the BOLD signal are associated with fluctuations in cardiac rhythm (Glover et al., 2007)  
34 that are independent of those associated with respiratory rate and depth (Chang et al., 2013, 2009),  
35 suggesting that RSFA may be susceptible to vascular signals of varying aetiologies, such as  
36 cardiovascular and cerebrovascular factors. Evidence in support of cardiovascular factors comes from  
37 Tsvetanov and colleagues (Tsvetanov et al., 2015, but also Makedonov et al., 2013; Viessmann et al.,  
38 2017, 2019; Theyers et al., 2018), who demonstrated that age-related differences in RSFA are mediated  
39 by cardiovascular health (as measured by pulseoximetry and electrocardiography, ECG), but not by  
40 neural function in terms of neural variability (as measured by magnetoencephalography, MEG).  
41 Evidence in support of cerebrovascular factors comes from Garrett et al. (2017) who found that “gold-  
42 standard” measures of cerebrovascular function (arterial spin labelling, ASL, and CO<sub>2</sub> inhalation-induced  
43 hypercapnia) are associated with RSFA. Importantly, both studies reported age-related differences in  
44 RSFA that remain after adjusting for individual differences in either cardiovascular or cerebrovascular  
45 factors. However, neither study considered jointly cardiovascular and cerebrovascular factors, and it  
46 remains unclear whether the unexplained age-related differences in RSFA reflect joint contributions  
47 from cardiovascular and cerebrovascular factors, as in the case of BOLD signal fluctuations (Chang et  
48 al., 2013, 2009). Alternatively, the unexplained age differences in RSFA may reflect neuronal factors,  
49 such as atrophy (Grady and Garrett, 2013), even though variation in neuronal activity does not explain  
50 the effect of age on RSFA (Tsvetanov et al., 2015).

51 Cardiovascular, cerebrovascular and other physiological signals, but not neuronal signals,  
52 contribute to the age-related differences in RSFA, yet none of these non-neuronal measures on their  
53 own could fully account for the effects of age on RSFA. It is possible that various vascular signals  
54 contribute to different components of the age effects on RSFA (Tsvetanov et al., 2020). However, no  
55 study to date has tested whether the cardiovascular and cerebrovascular signals together fully capture  
56 the effects of age on RSFA – an assumption underlying the use of RSFA as a scaling method. In this study  
57 we sought to investigate the effects of age on RSFA by the simultaneous assessment of the independent  
58 and shared effects of cardiovascular, cerebrovascular and neuronal effects on age-related differences  
59 in RSFA. To this end, we used a set of cardiovascular, cerebrovascular and volumetric measures in a  
60 population-based study of healthy ageing (age 18-88, N > 250, [www.cam-can.org](http://www.cam-can.org)). We hypothesized  
61 that age-related variation in RSFA are predicted by cardiovascular and cerebrovascular factors, but not  
62 grey matter volume, and therefore that the residuals in RSFA – after adjusting for these vascular factors  
63 – are not associated with age.

## 64 2. Methods

### 65 2.1. Participants

66 *Figure 1* illustrates the study design and image processing, using the Cambridge Centre Aging  
67 and Neuroscience dataset (Cam-CAN). Ethical approval was granted by Cambridgeshire 2 Research  
68 Ethics Committee. Participants gave written informed consent. A detailed description of exclusion  
69 criteria can be found in Shafto et al. (Shafto et al., 2014), including poor vision (below 20/50 on Snellen  
70 test; Snellen, 1862) or hearing (threshold 35dB at 1000Hz in both ears), ongoing or serious past drug  
71 abuse as assessed by the Drug Abuse Screening Test (DAST-20; Skinner, 1982), significant psychiatric  
72 disorder (e.g. schizophrenia, bipolar disorder, personality disorder) or neurological disease (e.g. stroke,  
73 epilepsy, traumatic brain injury). At an initial home assessment (Phase I), completed the Mini-Mental  
74 State Examination (MMSE > 25; Folstein et al., 1975) and Edinburgh Handedness Inventory (Oldfield,  
75 1971). Participants attended MRI (T1-weighted, arterial spin labelling (ASL), FLAIR-based white matter

76 hyperintensities, resting state EPI-BOLD and field-map images) and MEG (including resting state ECG-  
77 recording) on two occasions (Phase II and III) separated by approximately 1 year. We include here 226  
78 full datasets of good quality, required for all analysis (e.g. T1-weighted, FLAIR, ASL, resting fMRI and  
79 ECG recordings, see below). Demographic characteristics of the sample are described in Table 1.  
80 Imaging data were acquired using a 3T Siemens TIM Trio.

## 81 2.2. T1w image acquisition and processing

82 A 3D-structural MRI was acquired for each participant using T1-weighted Magnetization-  
83 Prepared Rapid Gradient-Echo (MPRAGE) sequence with Generalized Autocalibrating Partially Parallel  
84 Acquisition (GRAPPA) acceleration factor 2; Repetition Time (TR) = 2250ms; Echo Time (TE) = 2.99ms;  
85 Inversion Time (TI) = 900ms; flip angle  $\alpha = 9^\circ$ ; field of view (FOV) = 256mm x 240mm x 192mm;  
86 resolution = 1mm isotropic) with acquisition time of 4 minutes and 32 seconds.

87 All image processing was done using Automatic Analysis (AA 4.0; Cusack et al., 2014;  
88 <https://github.com/automaticanalysis/automaticanalysis>) implemented in Matlab (Mathworks,  
89 <https://uk.mathworks.com/>). The results here come from Release004 of the CamCAN pipelines. Each  
90 participant's T1 image was coregistered to the MNI template in SPM12  
91 (<http://www.fil.ion.ucl.ac.uk/spm>; Friston et al., 2007), and the T2 image was then coregistered to the  
92 T1 image using a rigid-body transformation. The coregistered T1 and T2 images underwent multi-  
93 channel segmentation (SPM12 Segment; Ashburner and Friston, 2005) to extract probabilistic maps of  
94 6 tissue classes: GM, WM, cerebrospinal fluid (CSF), bone, soft tissue, and background. The native-space  
95 GM and WM segmentations were used for diffeomorphic registration (DARTEL; Ashburner, 2007) to  
96 create whole group template images (Taylor et al., 2015). The group template was normalised to the  
97 MNI space using 12-parameter affine transformation.

## 98 2.3. fMRI image acquisition and processing

99 RSFA was estimated from resting state Echo-Planar Imaging (EPI) of 261 volumes acquired with  
100 32 slices (sequential descending order), slice thickness of 3.7 mm with a slice gap of 20% for whole

101 brain coverage (TR = 1970ms; TE = 30ms; flip angle  $\alpha = 78^\circ$ ; FOV = 192mm x 192mm; resolution = 3mm  
102 x 3mm x 4.44mm) during 8 minutes and 40 seconds. Participants were instructed to lay still with their  
103 eyes closed. The initial six volumes were discarded to allow for T1 equilibration. We quantified  
104 participant motion using the root mean square volume-to-volume displacement as per Jenkinson et al  
105 (2002). The rs-fMRI data were further pre-processed by wavelet despiking (see below).

106 The EPI data were unwarped (using field-map images) to compensate for magnetic field  
107 inhomogeneities, realigned to correct for motion, and slice-time corrected to the middle slice. The  
108 normalisation parameters from the T1 image processing were then applied to warp functional images  
109 into MNI space. We applied data-driven wavelet-despiking to minimise motion artefacts (Patel et al.,  
110 2014). We observed a high association between the amount of outlying wavelet coefficient and head  
111 motion across subjects ( $r = .739, p < .001$ ), demonstrating that it captured a large amount of motion  
112 artefacts in the data. Spatially normalised images were smoothed with a 12 mm FWHM Gaussian kernel.  
113 A general linear model (GLM) of the time-course of each voxel was used to further reduce the effects  
114 of noise confounds (Geerligs et al., 2017), with linear trends and expansions of realignment parameters,  
115 plus average signal in WM and CSF, their derivative and quadratic regressors (Satterthwaite et al.,  
116 2013). The WM and CSF signal was created by using the average across all voxels with corresponding  
117 tissue probability larger than 0.7 in associated tissue probability maps available in SPM12. A band-pass  
118 filter (0.0078-0.1 Hz) was implemented by including a discrete cosine transform set in the GLM,  
119 ensuring that nuisance regression and filtering were performed simultaneously (Hallquist et al., 2013;  
120 Lindquist et al., 2019). Finally, we calculated subject specific maps of RSFA based on the normalized  
121 standard deviation across time for processed resting state fMRI time series data.

## 122 2.4. ASL image acquisition and processing

123 To assess resting cerebral blood flow, we used pulsed arterial spin labelling (PASL, PICORE-Q2T-  
124 PASL in axial direction, 2500ms repetition time, 13ms echo time, bandwidth 2232 Hz/Px, 256 x 256 mm<sup>2</sup>  
125 field of view, imaging matrix 64x64, ten slices, 8 mm slice thickness, flip angle 90°, 700 ms inversion

126 time (TI) 1, TI2 = 1800 ms, 1600 ms saturation stop time). The imaging volume was positioned to  
127 maintain maximal brain coverage with a 20.9 mm gap between the imaging volume and a labelling slab  
128 with 100mm thickness. There were 90 repetitions giving 45 control-tag pairs (duration 3'52"). In  
129 addition, a single-shot EPI (M0) equilibrium magnetization scan was acquired. Pulsed arterial spin  
130 labelling time series were converted to cerebral blood flow (CBF) maps using ExploreASL toolbox  
131 (Mutsaerts et al., 2018). Following rigid-body alignment, the spatial normalised images were smoothed  
132 with a 12 mm FWHM Gaussian kernel.

## 133 2.5. Cardiovascular measures

### 134 2.5.1. *Physiological recordings*

135 Cardiac activity data were acquired using bipolar ECG while acquiring the MEG data, and  
136 processed using PhysioNet Cardiovascular Signal Toolbox (Goldberger et al., 2000; Vest et al., 2018) in  
137 Matlab (MATLAB 2017b, The MathWorks Inc, Natick, MA). To address non-stationarity in ECG  
138 recordings, mean heart rate (HR) and heart rate variability (HRV) summary measures were based on  
139 the median across multiple sliding 5-min windows in 30-second steps across the entire eyes-closed,  
140 resting-state acquisition, 8.5 minutes. Estimation of mean heart rate (HR) was based on the mean  
141 number of successive N-N (normal-to-normal) intervals within each 60-second interval during each 5-  
142 minute period recording. To estimate the HRV, we used the frequency-domain information of normal-  
143 to-normal (NN) intervals, which provides a measure of low- and high- frequency components of the  
144 HRV (unlike time-domain alternatives e.g. the root mean squared difference of successive intervals  
145 (RMSSD), which pertain mainly to high-frequency dynamics of HRV, (Malik et al., 1996). We calculated  
146 low-frequency (0.05 – 0.15 Hz; LF-HRV) and high-frequency (0.15-0.4 Hz; HF-HRV) power. Segments  
147 classified as atrial fibrillation were excluded from further analysis, and any participant with >50% atrial  
148 fibrillation was excluded.

149           2.5.2. *White matter hyperintensities (WMH)*

150           Estimates of white matter lesion burden in our sample have been reported previously  
151 (Fuhrmann et al., 2017). In summary, white matter lesion was estimated using the lesion growth  
152 algorithm in the LST toolbox for SPM (Schmidt et al., 2012) with  $\kappa$  of 0.7.

153           2.5.3. *Other risk factors of cardiovascular health: blood pressure and body mass index*

154           Systolic and diastolic blood pressure were measured at rest, seated, using an automated  
155 sphygmomanometer (A&D Medical Digital Blood Pressure Monitor, UA-774). The average of three  
156 measurements was used. BMI was calculated as weight (kg) / height (m)<sup>2</sup>, using portable scales (Seca  
157 875).

158           2.6. Data reduction

159           Datasets of interest stemmed from a wide range of modalities (RSFA, ASL, T1-weighted, FLAIR  
160 and ECG measures). To make these datasets tractable, we analysed a set of summary measures for  
161 each of the modality (also known as features or components) as illustrated in Figure 1. This had two  
162 advantages. First, it reduced the number of statistical comparisons. Second, it separated spatially  
163 overlapping sources of signal with different aetiologies within a modality (Xu et al., 2013), e.g.  
164 cardiovascular *versus* cerebrovascular signals, which may vary across individuals and brain region in  
165 RSFA (Tsvetanov et al., 2015) and ASL data (Mutsaerts et al., 2017). We used independent component  
166 analysis (ICA) across participants to derive spatial patterns of each imaging modality across voxels. As a  
167 proxy of vascular health, we used exploratory factor analysis to derive a latent variables from a set of  
168 measures related to cardiac function derived from the resting heart rate signal and other risk factors  
169 (Varadhan et al., 2009; Wardlaw et al., 2014).

170           2.6.1. *Indices of RSFA, T1 and CBF maps using Independent Component Analysis*

171           Group ICA was implemented on RSFA, GMV and CBF maps separately. For each modality, data  
172 were decomposed to a set of spatially independent sources using the Source Based Morphometry  
173 toolbox (Xu et al., 2009) in the Group ICA for fMRI Toolbox (GIFT; <http://mialab.mrn.org/software/gift>).



174 In brief, the fastICA algorithm was applied after the optimal number of sources explaining the variance  
175 in the data was identified using PCA with Minimum Description Length (MDL) criterion (Hui et al., 2011;  
176 Li et al., 2007; Rissanen, 1978). By combining the PCA and ICA, one can decompose an n-by-m matrix  
177 of participants-by-voxels into a source matrix that maps independent components (ICs) to voxels (here  
178 referred to as “IC maps”), and a mixing matrix that maps ICs to participants. The mixing matrix indicates  
179 the degree to which a participant expresses a defined IC. The loading values in the mixing matrix were  
180 scaled to standardized values (Z-scores) and used for between-participant analysis of summary  
181 measures from other modalities. The maximum number of available datasets within each modality was  
182 used, recognising that ICA decomposition accurately represents individual variation despite different  
183 group sizes while maximizing statistical power (Calhoun et al., 2008; Erhardt et al., 2011).

#### 184 2.6.2. *Indices of vascular health using Exploratory Factor Analysis*

185 As a vascular health index, we sought a summary measure that characterized the complexity  
186 of cardiovascular signal (Varadhan et al., 2009; Wardlaw et al., 2014). We used factor analysis on the  
187 mean HR, high-frequency and low-frequency HRV, systolic and diastolic blood pressure, white matter  
188 hyperintensities and body-mass index to extract a set of latent variables reflecting variability in  
189 cardiovascular health across all individuals. The analysis used matlab *factoran.m* with default settings.  
190 Input variable distributions which deviated from Gaussian normality (1-sample Kolmogorov-Smirnov  
191 Test, p-value<0.05) were log-transformed (1-sample Kolmogorov-Smirnov Test, p-value > 0.05) (Fink,  
192 2009).

#### 193 2.7. Analytical approach

194 We performed both voxel-wise and component-based analyses using multiple linear regression  
195 (MLR) with robust fitting algorithm (matlab function *fitlm.m*). Voxel-level analysis was based on voxel-  
196 wise estimates across all imaging maps (RSFA, GM and ASL), while component-based analysis was based  
197 on component-wise estimates across all imaging components. We adopted a two-stage procedure for

198 each RSFA voxel/component (Figure 1). In the first stage we used MLR with RSFA values for all  
199 individuals as dependent variable. The second stage correlated the residuals from each model with age.

200 In the first level models, independent variables included either cardiovascular health, CBF or  
201 grey matter measures and RSFA values as dependent variable. Covariates of no interest included  
202 gender, head motion and handedness. In the model with grey matter (model V, see below), the signal  
203 defined in the CSF mask was considered as a covariate of no interest to minimize the influence of non-  
204 morphological confounds in T1-weighted data (Bhogal et al., 2017; Ge et al., 2017; Tardif et al., 2017).  
205 Additional inclusion of total intracranial volume (TIV) did not change the principal results. Non-normally  
206 distributed variables were logarithmically or exponentially transformed to conform normality (Fink,  
207 2009).

208 We constructed five models:

209 - Model 1: Covariates [of no interest]

$$210 \quad y \sim \beta_0 \mathbf{1} + Covs + \varepsilon$$

211 - Model 2: Covariates and cerebrovascular measures

$$212 \quad y \sim \beta_0 \mathbf{1} + \beta_1 CBF_1 + Covs + \varepsilon_{CBF}$$

213 - Model 3: Covariates and cardiovascular measures

$$214 \quad y \sim \beta_0 \mathbf{1} + \beta_1 CVH + Covs + \varepsilon_{CVH}$$

215 - Model 4: Covariates, cardiovascular and cerebrovascular measures

$$216 \quad y \sim \beta_0 \mathbf{1} + \beta_1 CBF + \beta_2 CVH + Covs + \varepsilon_{CBF,CVH}$$

217 - Model 5: Covariates and grey matter volume measures

$$218 \quad y \sim \beta_0 \mathbf{1} + \beta_1 GMV + Covs + \varepsilon_{GMV}$$

219 Note that the independent variables in Models 2, 4 and 5 included measures with voxel-specific  
220 information, i.e. RSFA values across subjects in a given voxel were predicted by the CBF/GM values for  
221 the corresponding voxel.

222           The residuals,  $\epsilon$ , from each model were then used in a second-stage linear regression (i.e.  
223   correlational analysis) to estimate their association with age. Voxels where the residuals correlate with  
224   age ( $p < .05$ , FDR-corrected) indicate that the independent variables in first-stage model could not  
225   explain sufficiently the age-dependent variability in RSFA. Conversely, residuals not associated with age  
226   would suggest that the independent variables considered in the model are sufficient to explain age-  
227   dependent variability in RSFA.

228           This two-stage procedure was performed for each voxel of RSFA maps resulting in a statistics  
229   map for each model indicating the association between residuals and age. Statistical maps were  
230   corrected for multiple comparisons at  $p < 0.05$  (FDR-corrected). To further address multiple  
231   comparisons and voxel-voxel mapping between modalities, we performed complementary analysis  
232   where voxel-wise estimates of brain measures were substituted with subject-wise IC loadings, see  
233   Section 2.6.

234           We also tested whether the distribution of age-RSFA residuals correlations across all voxels  
235   formed differed from the predicted distribution under pure randomness. We constructed 5000  
236   distributions of age-RSFA residual correlations across all brain voxels ( $D_{\text{Voxels}}$ ), where RSFA residuals were  
237   based either on a model with observed RSFA values ( $D_{\text{Voxels}1}$ ) or permuted RSFA values ( $D_{\text{Voxels}2-5000}$ ).  
238   Distribution medians and distribution shapes were compared using Wilcoxon rank sum test and  
239   Kolmogorov-Smirnov test respectively. We performed a pair-wise comparison across all 5000  
240   distribution shapes using Kolmogorov-Smirnov test, resulting in a distribution of 4999 similarity scores  
241   ( $D_{\text{Similarity}}$ ) between each  $D_{\text{Voxels}}$  with the remaining 4999  $D_{\text{Voxels}}$ . Next, we estimated the number of times  
242   ( $N_p$ ) the distribution of similarity for observed RSFA values ( $D_{\text{Similarity}1}$ ) is statistically different than the  
243   permuted distributions of similarities ( $D_{\text{Similarity}2-5000}$ ) using Wilcoxon rank sum test. The ratio  $N_p/5000$   
244   provided a level of significance, e.g. a value  $< 0.05$  suggested that the distribution of age-RSFA residual  
245   values is not as predicted by a model with pure randomness (at significance level  $p < 0.05$ ) and suggests  
246   an association between age and RSFA residuals. The procedure was applied separately for each of the

247 five models across all brain voxels, as well as for different tissue types (cerebrospinal fluid, grey matter  
248 and white matter voxels with values above 0.4 in SPM's tissue probability maps).

## 249 3. Results

### 250 3.1. Main and age effects of RSFA, CBF and CVH

#### 251 3.1.1. *Resting state fluctuation amplitudes (RSFA)*

252 Whole group voxel-wise analysis revealed relatively high RSFA values (relative to the average  
253 across the brain) across all individuals in the frontal orbital, inferior frontal gyrus (IFG), dorsolateral  
254 prefrontal cortex (dlPFC), superior frontal cortex, anterior and posterior cingulate, and lateral parietal  
255 cortex (Figure 2a). With respect to aging, we observed age-related decreases in RSFA in the bilateral  
256 IFG, bilateral dlPFC, bilateral superior frontal gyrus, primary visual cortex, cuneus, precuneus, posterior  
257 and anterior cingulate, superior temporal gyrus, medial parietal cortex, and lateral parietal cortex  
258 (Figure 2b). Regions in the proximity of frontal white matter, cerebrospinal fluid and large vascular  
259 vessels showed a significant increase of RSFA values as a function of age.

#### 260 3.1.2. *Cerebral blood flow (CBF)*

261 Whole group voxel-wise analysis revealed a pattern of relatively high cerebral blood flow across  
262 all individuals in cortical and subcortical brain areas with high perfusion and metabolism properties  
263 (Figure 2c) including caudal middle-frontal, posterior cingulate, pericalcarine, superior temporal and  
264 thalamic regions. Moderate to low CBF values in the superior-parietal and inferior-frontal areas of the  
265 cortex (Figure 2c, every 10 axial slices from -30 to 70) may reflect the axial positioning of the partial  
266 brain coverage sequence used in the study. With respect to aging, we observed age-related reductions  
267 in CBF in the bilateral dorsolateral prefrontal cortex, lateral parietal cortex, anterior and posterior  
268 cingulate, pericalcarine and cerebellum (Figure 2c). In addition, we observed age-related CBF increase  
269 in regions susceptible to individual and group differences in in arterial transit time biasing the accuracy  
270 of CBF estimation, including middle temporal gyrus (Mutsaerts et al., 2017).

271           3.1.3. *Grey matter volume (GMV)*

272           We identified significant whole-group effects across all grey matter voxels (Figure 2e). In  
273 addition, there was a widespread age-related decrease in GMV, in bilateral temporal lobes, bilateral  
274 prefrontal, middle and superior frontal areas, bilateral medial occipital areas, cerebellum, and  
275 subcortical areas including thalamus, caudate and putamen (Figure 2f), consistent with previous reports  
276 (Mohajer et al., 2020; Peelle et al., 2012; Tsvetanov et al., 2019).

277           3.1.4. *Cardiovascular health (CVH)*

278           An exploratory factor analysis with principal component analysis indicated a three-factor  
279 structure of the cardiovascular health and risk measures. Factor 1 loadings indicated a factor expressing  
280 variability in blood pressure measures, where individuals with higher subject scores had larger systolic  
281 and diastolic pressure (Figure 3). Subjects scores did not correlate with age ( $r = +.061$ ,  $p=.328$ ),  
282 indicating that variability in blood pressure was not associated uniquely with aging over and above their  
283 contribution to other factors in the analysis. Factor 2 was mainly expressed by heart rate and HRV  
284 measures, where individuals with high subject scores had low resting pulse and high HRV metrics.  
285 Subject scores were correlated negatively with increasing age ( $r = -.417$ ,  $p<.001$ ), consistent with  
286 findings of age-related decrease in HRV (Figure 3). Finally, Factor 3 was expressed negatively by HRV  
287 and positively by WMH and systolic blood pressure, indicating that individuals with high subjects scores  
288 were more likely to have high burden of WMH, high systolic blood pressure and low HRV (Figure 3).  
289 Subject scores were associated positively with age ( $r = +.713$ ,  $p<.001$ ), suggesting that a portion of the  
290 age-related decrease in HRV is coupled with increase in WMH and systolic blood pressure.

291           3.2. Correlations between Age and RSFA residuals

292           3.2.1. *Voxel-based analysis*

293           *Covariates of no interest only (Model I)*

294           The whole-group voxel-wise analysis of RSFA maps revealed brain regions with high vascular  
295 reactivity including frontal orbital, inferior frontal gyrus, inferior frontal gyrus, dorsolateral prefrontal

296 cortex, superior frontal cortex, anterior and posterior cingulate, and lateral parietal cortex. We  
297 observed age-related decrease in RSFA in the bilateral inferior frontal gyrus, bilateral dorsolateral  
298 prefrontal cortex, bilateral superior frontal gyrus, primary visual cortex, cuneus, precuneus, posterior  
299 and anterior cingulate, superior temporal gyrus, medial parietal cortex, and lateral parietal cortex. In  
300 addition, we observed age-related decrease in RSFA in the proximity of ventricles and large vascular  
301 vessels.

#### 302 *Controlling for Cerebrovascular Factors (Model II)*

303 We observed significant correlations between age and the RSFA residuals after controlling for  
304 subject variability in CBF and covariates of no interest at an FDR-adjusted p-value of 0.05 (Figure 4,  
305 model II). The spatial extent and the size of the statistical maps were similar to the analysis with RSFA  
306 residuals after controlling for covariates only (Figure 2d and Figure 4, model I), suggesting that CBF does  
307 not fully explain variability in RSFA.

#### 308 *Controlling for Cardiovascular Factors (Model III)*

309 We observed no significant correlations between age and the RSFA residuals after controlling  
310 for variability in CVH and covariates of no interest at an FDR-adjusted p-value of 0.05 (Figure 4, model  
311 III), suggesting that CVH can explain sufficiently age-dependent variability in RSFA, at least at the level  
312 of statistically-corrected voxels.

#### 313 *Controlling for Cardiovascular and Cerebrovascular Factors (Model IV)*

314 We observed no significant correlations between age and the RSFA residuals after controlling  
315 for variability in CVH, CBF and covariates of no interest at an FDR-adjusted p-value of 0.05 (Figure 4,  
316 model IV), suggesting that CVH and CBF together explain sufficiently age-dependent variability in RSFA.

#### 317 *Controlling for Grey Matter Volume (Model V)*

318 We observed significant correlations between age and the RSFA residuals after controlling for  
319 grey matter volume (GMV) and covariates of no interest at an FDR-adjusted p-value of 0.05 (Figure 4,  
320 model V), suggesting that GMV does not adequately explain variability in RSFA, at the voxel-wise level.

321

322 *3.2.2. Distribution-based analysis*

323 The medians of observed and permuted data did not differ significantly ( $p > .1$  for all five models). In  
324 terms of the distributions, the level of statistical significance decreased after controlling for  
325 cardiovascular, cerebrovascular and GMV signals ( $p < .001$ ,  $p < .001$ ,  $p = .015$ , and  $p < .001$  for models 1, 2,  
326 3 and 5 respectively), see Table 2. The model considering jointly cardiovascular and cerebrovascular  
327 signals (model 4) indicated a difference in the distribution of observed and permuted data ( $p = 0.016$ ),  
328 reflecting a small level of correlation between age and RSFA residuals in some voxels. It is unclear  
329 whether the signal originated in a particular tissue type, so we repeated the permutation approach for  
330 each tissue type separately (Table 2). For models 1, 2 and 5 the RSFA residuals were associated with  
331 age across all three tissue types, suggesting that variability in cerebrovascular and grey matter cannot  
332 account fully for the effects of age on RSFA in all tissue types. However, the models controlling for  
333 cardiovascular health (Models 3 and 4) were not significant for grey matter and white matter tissue.  
334 The analysis on CSF voxels was highly significant suggesting that any potential age-related effects on  
335 RSFA not captured by cardiovascular and cerebrovascular signals on voxel-level are focal to CSF areas,  
336 rather than grey matter or white matter.

337 *3.2.3. Component-based analysis*

338 CVH signals sufficiently explained variance in RSFA, in the voxel-based analysis (after FDR  
339 correction for multiple comparisons) and in grey-matter areas in distribution-based analysis. This was  
340 not the case for CBF or GMV in the voxel-based analysis, as well as for CVH in CSF regions in distribution-  
341 based analysis. However, this might reflect limitations of these analyses to separate spatially  
342 overlapping sources of signal with different aetiology and the large number of comparisons (see  
343 Methods). Therefore, we used independent component analysis to decompose each imaging modality  
344 to a small number of spatially-independent components and test their ability to explain variance of  
345 RSFA.

346 Figure 5 shows the decomposition of the RSFA, CBF and GMV datasets with 18, 13 and 16  
347 number of components, respectively, according to the MDL criterion (Li et al., 2007). The spatial maps  
348 of the components and the between subject-correlations of loading values revealed patterns of signal  
349 from grey matter, white matter, cerebrospinal fluid and vascular aetiology (Figure 5), which were highly  
350 consistent with voxel-wise analysis (Figure 2), previous reports of RSFA (Tsvetanov et al., 2015) and  
351 structural data (Eckert et al., 2010; K. Liu et al., 2017).

352 The effects of ageing on the independent components loadings was consistent with the voxel-  
353 level analysis. Specifically, RSFA components with vascular ethology indicated an age-related increase  
354 in the loading values, while ICs confined within grey matter areas showed age-related decrease in the  
355 loading values (Figure 5a, left side of the panel). Several CBF components demonstrated age-related  
356 decrease in loading values, including inferior frontal gyrus, superior frontal gyrus, cuneus, precuneus,  
357 lateral occipital cortex and motor cortex (Figure 5b, left side of the panel). All but one GMV component  
358 in the cerebellum demonstrated age-related decrease in loading values consistent with brain-wide  
359 atrophy in ageing (Figure 5).

360 Next, we turn to the correlations between age and residuals of the RSFA ICs. We focused on  
361 ICs that showed age-related differences in the subject loading values (10 out of 18), after controlling  
362 for CBF IC loading values, GMV IC loading values or CVH factor loadings (Figure 6).

#### 363 *Controlling for Cerebrovascular Factors (Model II)*

364 The associations between age and RSFA residuals after controlling for CBF loading values were  
365 weaker in vascular ICs and abolished in GM ICs compared to the analysis with covariates only (Figure 6,  
366 Model I vs Model 2). Unlike in the voxel-based analysis, this ICA approach suggests that CBF does explain  
367 some age-related variability in RSFA across many networks, especially those in GM areas, which may be  
368 due to reduced number of comparisons and improved characterisation of sources of signals in RSFA  
369 and CBF data using ICA.



370 *Controlling for Cardiovascular Factors (Model III)*

371 After controlling for differences in CVH, RSFA residuals in two ICs (IC3 and IC7) were correlated  
372 with age (uncorrected p-value at 0.05 significance level), although to a lesser extent compared to the  
373 analysis with covariates only (Model III vs Model I), indicating that CVH can explain age-dependent  
374 variability in most, but not all, RSFA ICs.

375 *Controlling for Cerebrovascular and Cardiovascular Factors (Model IV)*

376 We observed no significant correlations between age and the RSFA residuals after controlling  
377 for variability in CVH and CBF (even at an uncorrected p-value of 0.05, see Figure 6), suggesting that  
378 together, CVH and CBF can explain age-dependent variability in RSFA.

379 *Controlling for Grey Matter Volume (Model V)*

380 RSFA ICs adjusted for GMV ICs demonstrated reduced correlations between RSFA and age  
381 (particularly RSFA ICs of grey matter territories), indicating that age-related differences in RSFA ICs can  
382 be partly explained by grey matter atrophy.

383 *Controlling for Grey Matter Volume independent of Cardiovascular Factors*

384 Some degree of association between age differences in RSFA and grey matter atrophy is  
385 expected given cardiovascular health has been linked to brain-wide atrophy (Gu et al., 2019; Srinivasa  
386 et al., 2016) and T1-weighted data is confounded by non-morphological signals (Bhogal et al., 2017; Ge  
387 et al., 2017; Tardif et al., 2017). Therefore, to test whether the effects of brain atrophy on RSFA were  
388 independent of the effects of CVH on brain atrophy, we controlled for the effects of CVH in GMV ICs.  
389 Then we used the GMV residuals after fitting CVH to GMV IC loadings (i.e. GMV orthogonalised with  
390 respect to CVH) to estimate RSFA residuals and subsequently their correlation with age (Figure 6, Model  
391 6). The effects between RSFA residuals and age in Model 6 were similar to Model 1, suggesting that  
392 GMV differences independent of CVH were not correlated to differences in RSFA.

393

394

## 395 4. Discussion

396 The principle result of this study is to confirm the suitability of resting state fluctuation amplitude (RSFA)  
397 to quantify vascular influences in BOLD-based fMRI signals, and to demonstrate that the age effects on  
398 RSFA reflect variability in vascular factors rather than neuronal factors. We demonstrate that the effects  
399 of age on RSFA can be sufficiently captured by the joint consideration of cardiovascular (based on ECG,  
400 BP, WMH and BMI measures) and cerebrovascular factors (CBF from ASL). Variance in brain atrophy  
401 (GM volume Figure 6) and neuronal activity (Kumral et al., 2019; Tsvetanov et al., 2015) do not explain  
402 unique relationship between RSFA and age. This means that RSFA is a suitable measure for  
403 differentiating between vascular and neuronal influences on task-based BOLD signal. Without  
404 modelling the age-related differences in cardiovascular and cerebrovascular factors, changes in  
405 'activity' based on BOLD-fMRI could be misinterpreted, thereby undermining conceptual advances in  
406 cognitive ageing.

### 407 Cardiovascular factors and age-differences in RSFA

408 We used factor analysis to estimate cardiovascular health from a wide range of cardiovascular  
409 measures (Varadhan et al., 2009; Wardlaw et al., 2014). Our three factor solution resembled previous  
410 reports (Chen et al., 2000; Goodman et al., 2005; Khader et al., 2011; Mayer-Davis et al., 2009), with  
411 two factors associated with blood pressure and heart rate variability (factors 1 and 2, respectively). A  
412 third factor expressed white matter hyperintensities, blood pressure, heart rate variability and body-  
413 mass index, suggesting a cerebrovascular origin.

414 These three factor indices of cardiovascular health explained most of the age-related variability  
415 in RSFA, leaving little to no associations between age and RSFA residuals in grey matter regions (after  
416 controlling for these cardiovascular signals). This suggests that differences in cardiovascular health  
417 mediate most of the age effects on RSFA (Tsvetanov et al., 2015). Interestingly, each CVH factor was

418 associated with a distinct spatial RSFA pattern (Supplementary Figure 2) and collectively provided  
419 additional explanatory value for the overall age-differences in brain-wide RSFA. Next, we turn to neural  
420 and cerebrovascular contributions to BOLD.

#### 421 Cerebrovascular signals and age-differences in RSFA

422 Our measure of cerebrovascular function was based on cerebral blood flow estimates from a  
423 common perfusion-based ASL sequence. Here, we refer to cerebrovascular function as an umbrella  
424 term of physiological alterations in the neurovascular unit including resting CBF, cerebrovascular  
425 reactivity, cerebral autoregulation and pulsatility. The observed average, gender and age effects were  
426 consistent with previous reports. The age effects on CBF values were in agreement with previous  
427 reports (Chen et al., 2011; Zhang et al., 2018), with decreases mainly found in regions that are  
428 associated with high perfusion and metabolic demand, including precuneus, cuneus, prefrontal cortices  
429 and cerebellum. The mechanisms underlying the observed CBF decrease across the adult lifespan is a  
430 subject of continuous debate between structural and physiological alterations of the neurovascular unit  
431 (Girouard and Iadecola, 2006; Tarumi and Zhang, 2018; Tsvetanov et al., 2020). We also observed age-  
432 related increase in CBF in temporal regions, which may reflect macro-vascular artifacts that are  
433 common to arterial spin labelling findings (Dette et al., 2012; Mutsaerts et al., 2017) due to prolonged  
434 arterial transit time with ageing (Dai et al., 2017). This nonspecific nature of resting CBF signal changes  
435 during ageing is particularly problematic for fMRI BOLD studies, since differences in physiology on that  
436 level may confound the interpretation of the BOLD signal as a surrogate measure of evoked neural  
437 activity (Whittaker et al., 2016).

438 Compared to voxel-wise estimates, our component-wise CBF values captured better the age-  
439 related effects of RSFA, especially in grey matter areas (see below on differences between voxel-wise  
440 and component-wise analysis). Nevertheless, neither the voxel-wise nor component-based analysis of  
441 CBF values could explain sufficiently the effects of age on RSFA, suggesting that RSFA may not be  
442 attributed exclusively to sources of signal linked to cerebrovascular function (Garrett et al., 2017; Liu et

443 al., 2012). There was a positive correlation between resting CBF and RSFA in brain areas typically  
444 associated with high blood perfusion and metabolic demands, including cuneus, precuneus,  
445 intraparietal sulcus, inferior temporal cortices, dorsolateral prefrontal cortex and anterior cingulate  
446 (Supplementary Figure 3). But, we also observed negative associations between RSFA and CBF in  
447 inferior brain areas, mainly close to vascular territories i.e. the higher the RSFA the lower the CBF values  
448 were in these regions (Supplementary Figure 3). This may reflect the dominance of pulsatility influences  
449 in RSFA signals near vascular territories and the CSF (for more information see section: Spatial  
450 distribution and age effects on RSFA). This may have adverse effects on tissue perfusion in neighboring  
451 areas (Tarumi et al., 2014). The coexistence between positive and negative relationships between RSFA  
452 and CBF measures in our study explains previous observations of a varied direction in the relationship  
453 between these measures across regions for groups and individuals with differences in vascular health  
454 (Garrett et al., 2017).

#### 455 Joint effect of cardiovascular and cerebrovascular factors

456 The joint consideration of cardiovascular and CBF measures fully explained the (significant)  
457 effects of age on RSFA in grey matter regions, despite their differential association with ageing (Zlokovic,  
458 2011). This suggests that RSFA can normalize BOLD fMRI for both cardiovascular and cerebrovascular  
459 factors as highly reliable and temporally stable measurement compared to current standard  
460 approaches to normalize BOLD fMRI (eg. hypercapnia) (Golestani et al., 2015; Lipp et al., 2015). Lower  
461 reproducibility in “gold standard” approaches could be due to susceptibility of cerebrovascular  
462 measures to short-term variable physiological modifiers (e.g. caffeine, nicotine, time of the day,  
463 drowsiness) (Clement et al., 2018). The high reproducibility of RSFA in healthy adults could come from  
464 the additional contribution of short-term but stable cardiovascular health signals (e.g. heart condition  
465 or white matter hyperintensities), which are independent of cerebrovascular factors. RSFA reflects both  
466 cardiovascular and cerebrovascular signals, which are associated with distinct spatial patterns (see  
467 section Spatial distribution and age effects on RSFA). RSFA can help dissociate age-related differences

468 in cardiovascular, cerebrovascular and neural function in task-based BOLD signal, which is important  
469 for using fMRI to understand the mechanisms of cognitive aging.

#### 470 Grey matter volume and age-differences on RSFA

471 Voxel-wise and component-based analyses indicated weak associations between age-  
472 differences in RSFA and grey matter volume, which were abolished after adjusting for variability in  
473 cardiovascular health. Interestingly, the strongest effects were at the boundaries between grey matter  
474 and other tissue types (white matter and CSF), rather than deep cortical areas (Supplementary Figure  
475 3). The spatial pattern of the effects for cortical areas was similar to those observed between CBF and  
476 RSFA measures. There was a positive relationship between RSFA and grey matter volume in the  
477 precuneus, intraparietal sulcus, dorsolateral prefrontal cortex and dorsal anterior cingulate; which  
478 could reflect the cerebrovascular component of the RSFA signal (see above). In addition, the cerebellum  
479 and subcortical areas near vascular territories showed negative associations, i.e. individuals with less  
480 grey matter volume had larger RSFA values, likely reflecting the cardiovascular components of the RSFA  
481 signal (see below, Spatial distribution and age effects of RSFA). Importantly, there were no associations  
482 between RSFA and grey matter volume after adjusting for cardiovascular health. This is suggestive of  
483 an indirect association between RSFA and grey matter volume introduced by cardiovascular effects on  
484 brain-wide atrophy (Gu et al., 2019; Srinivasa et al., 2016) and other non-morphological confounds in  
485 T1-weighted data (Bhogal et al., 2017; Ge et al., 2017; Tardif et al., 2017). The lack of evidence for an  
486 association between age-related effects on RSFA and brain atrophy after adjusting for cardiovascular  
487 health is consistent with previous reports using direct physiological measures of neural activity (MEG  
488 and EEG): no age-related associations between RSFA and neuronal indices were detected (Kumral et  
489 al., 2019; Tsvetanov et al., 2015). Furthermore, potential age-related associations between RSFA and  
490 cognitive function are fully explained by cerebrovascular risk factors, such as WMH burden (Millar et  
491 al., 2020). Taken together these findings suggest that the age-related differences in BOLD signal  
492 variability at resting state are unlikely to be of neuronal origin beyond the effects of age on various  
493 types of vascular signals.

494

## 495 Spatial distribution and age effects on RSFA

496 The voxel-wise and component-based analysis of RSFA maps reveal brain regions with high vascular  
497 reactivity (Di et al., 2012; Kalcher et al., 2013; Kannurpatti et al., 2011; Liu et al., 2013; Mueller et al.,  
498 2013; Yezhuvath et al., 2009), and accord with previous studies of average and age-effects on RSFA  
499 (Golestani et al., 2016; Lipp et al., 2015; P. Liu et al., 2017; Tsvetanov et al., 2015). These patterns of  
500 spatially distinct cortical areas might reflect segregation of cortical tissue composition, e.g. delineation  
501 on the basis of vascular density and metabolic demands in areas with cyto- or myeloarchitectonic  
502 differences (Annese et al., 2004; Fukunaga et al., 2010; Geyer et al., 2011; Glasser and Van Essen, 2011).  
503 The age-related increase in RSFA in areas with vascular, WM and CSF partitions may reflect the impact  
504 of vascular pulsatility downstream of cerebral arteries due to wall stiffening of blood vessels (Robertson  
505 et al., 2010; Webb et al., 2012), which may influence BOLD signal variability in neighboring brain tissue  
506 (Lee and Oh, 2010; O'Rourke and Hashimoto, 2007; Tarumi et al., 2014; Viessmann et al., 2017). The  
507 pulsatility can influence signal in white matter and cerebrospinal fluid areas (Makedonov et al., 2013;  
508 Tarumi et al., 2014; Theyers et al., 2018; Viessmann et al., 2019). In addition, it is also possible that the  
509 RSFA signal in one area of the brain captures the presence of multiple sources of signal with different  
510 aetiology. For example, the observed signal in one CSF voxel may be a mixture of signals coming from  
511 fluctuations in resting CBF in neighboring vascular territories and pulsatility influences in the  
512 perivascular space. Spatially overlapping sources of signal might be difficult to detect and dissociate  
513 using a univariate approach. This motivates the use of multivariate data-driven approaches, as  
514 highlighted by our findings. In sum, this suggests that RSFA reflects different types of vascular signals  
515 with distinct spatial patterns in terms of signals with cerebrovascular origin in grey matter regions, and  
516 those with cerebro- and cardio-vascular origin in other parts of the brain.

517

## 518            Limitations and future directions

519    There are limitations to the current study. In terms of cardiovascular health, there may be more  
520    important measures that were not present in the CamCAN sample. Moreover, the analysis of heart rate  
521    variability estimates was based on normal-to-normal beats (Vest et al., 2018). The difference between  
522    NN- and RR-beat analysis is that the former considers the detection and exclusion of segments and  
523    participants with atrial fibrillation and other abnormal beats. While NN-beat analysis optimises the  
524    detection of unbiased estimates of cardiovascular health, it also precludes sensitivity to potential  
525    effects of arrhythmia and abnormal heart beats on RSFA in our analysis, which might be relevant to  
526    regions susceptible to pulsatility effects (Webb and Rothwell, 2014).

527    In terms of cerebrovascular signals, the use of ASL-based CBF measurements could be complemented  
528    with individual-based arterial transit time measurement in order to improve the accuracy of ASL  
529    imaging in older populations (Dai et al., 2017). There are also other means to assess cerebrovascular  
530    function, including cerebrovascular reactivity, including CO<sub>2</sub>-inhalation-induced hypercapnia (Liu et al.,  
531    2019), breath-hold-induced hypercapnia (Handwerker et al., 2007; Mayhew et al., 2010; Riecker et al.,  
532    2003; Thomason et al., 2007, 2005), hyperventilation-induced hypocapnia (Bright et al., 2009; Krainik  
533    et al., 2005), and venous oxygenation (Liau and Liu, 2009; Lu et al., 2010; Restom et al., 2007) and it is  
534    possible that these might reveal effects in RSFA where ASL-based CBF does not. Future studies should  
535    explore the utility of additional estimates from resting ASL-based CBF data to complement CBF  
536    quantification. For instance, little is known about whether resting CBF variability, which is statistically  
537    similar to RSFA, is sensitive to cerebrovascular reactivity and other vascular origins (Robertson et al.,  
538    2017). The ease, safety and tolerability of RSFA across the lifespan yields a considerable advantage for  
539    population and clinical studies.

540    Similar to the CBF analyses, the GMV findings generalized across voxel-wise and component-based  
541    analysis, but the component-based analysis seemed to be more sensitive to the age effects on RSFA in  
542    both CBF and GMV datasets. The greater generalization across datasets with independent component

543 analysis than voxel-based analysis may reflect several factors (Calhoun and Adali, 2008; Passamonti et  
544 al., 2019; Sui et al., 2012), e.g. reducing the burden of multiple comparisons, pooling information across  
545 multiple voxels with similar profiles, separating sources of signal with different etiology but with  
546 overlapping topologies and possibly improving the spatial correspondence across imaging modalities  
547 with different spatial scales, sequence parameters and signal properties. Therefore, the use of  
548 component-based analysis in studies comparing approaches for normalization of physiological signals  
549 may improve understanding the nature of the signal and the extent to which these neuroimaging  
550 modalities are related to one another.

551 In the current study, RSFA was estimated from resting state fMRI BOLD data prior to collection of other  
552 task-based fMRI scanning as in previous validation studies of RSFA (Kannurpatti and Biswal, 2008;  
553 Tsvetanov et al., 2015). Other means of RSFA-like estimates have been proposed for scaling BOLD  
554 activation data using fMRI BOLD data at different non-resting cognitive states, e.g. during task periods  
555 (Kazan et al., 2016) or fixation-/resting-periods succeeding task periods (Garrett et al., 2017). Given that  
556 short periods of cognitive engagement can modulate the BOLD signal in a subsequent resting state scan  
557 (Sami et al., 2014; Sami and Miall, 2013), future studies are required to generalise our findings to RSFA-  
558 like estimates derived from other types of fMRI BOLD acquisition.

559 Finally, this study has focussed on the effects of aging, but other studies aiming to understand individual  
560 differences or drug effects in fMRI BOLD might be affected in a similar manner. Therefore, future  
561 studies should consider the origins of the signal contributing to RSFA (cerebrovascular vs  
562 cerebrovascular) and more broadly their influence in fMRI BOLD imaging studies. In the light of  
563 increasing evidence of the role of cardiovascular and cerebrovascular factors in maintaining cognitive  
564 function, future studies might even consider RSFA as a predictor, rather than just as a covariate of no  
565 interest, when modelling the effects of interest (e.g. age or performance). Furthermore, while the  
566 proposed approach is based on plausible neurophysiology that can be used to evaluate its contribution  
567 to cognitive function, future studies could improve absolute quantification of neural function together



568 with its integration with deoxyhaemoglobin-dilution-based modelling (Davis et al., 1998; Hoge et al.,  
569 1999a, 1999b), haemodynamic response function modelling (West et al., 2019), generative modelling  
570 (Friston et al., 2003; Jafarian et al., 2020; Tsvetanov et al., 2016) and model-free decomposition  
571 (Bethlehem et al., 2020; Campbell et al., 2015; Samu et al., 2017; Tsvetanov et al., 2018) of fMRI BOLD  
572 data.

### 573 Concluding remarks

574 Cardiovascular and cerebrovascular signals together predict the age differences in RSFA, establishing  
575 RSFA as an important marker that can be used to accurately separate vascular signals from neuronal  
576 signals in the context of BOLD fMRI. We propose that RSFA is suitable to normalize BOLD, and control  
577 for differences in cardiovascular signals. This is particularly relevant to the research in neurocognitive  
578 aging, and may reduce selection bias, for example by permitting the inclusion of individuals with a wider  
579 range of hypertension, cardiovascular conditions or comorbidity. The use of RSFA as a mechanism to  
580 adjust for confounds in BOLD-fMRI, or as a predictor, will allow the development of better models of  
581 ageing and age-related disorders (Cabeza et al., 2018; Tsvetanov et al., 2018).

## 582 5. Acknowledgements

583 This work is supported by the British Academy (PF160048), the Guarantors of Brain (101149), the  
584 Wellcome Trust (103838), the Medical Research Council (SUAG/051 G101400; and SUAG/046  
585 G101400), European Union's Horizon 2020 (732592) and the Cambridge NIHR Biomedical Research  
586 Centre.

## 587 6. References

- 588 Annese, J., Pitiot, a., Dinov, I.D.D., Toga, a. W.W., 2004. A myelo-architectonic method for the  
589 structural classification of cortical areas. *Neuroimage* 21, 15–26.  
590 <https://doi.org/10.1016/j.neuroimage.2003.08.024>
- 591 Ashburner, J., 2007. A fast diffeomorphic image registration algorithm. *Neuroimage* 38, 95–113.  
592 <https://doi.org/10.1016/j.neuroimage.2007.07.007>
- 593 Ashburner, J., Friston, K.J., 2005. Unified segmentation. *Neuroimage* 26, 839–51.  
594 <https://doi.org/10.1016/j.neuroimage.2005.02.018>
- 595 Beard, J.R., Officer, A., de Carvalho, I.A., Sadana, R., Pot, A.M., Michel, J.-P., Lloyd-Sherlock, P., Epping-  
596 Jordan, J.E., Peeters, G.M.E.E. (Geeske), Mahanani, W.R., Thiyagarajan, J.A., Chatterji, S., 2016.  
597 The World report on ageing and health: a policy framework for healthy ageing. *Lancet* 387, 2145–  
598 2154. [https://doi.org/10.1016/S0140-6736\(15\)00516-4](https://doi.org/10.1016/S0140-6736(15)00516-4)
- 599 Bethlehem, R.A.I., Paquola, C., Seidlitz, J., Ronan, L., Bernhardt, B., Cam-CAN, Tsvetanov, K.A., 2020.  
600 Dispersion of functional gradients across the lifespan. *bioRxiv* 2020.02.27.968537.  
601 <https://doi.org/10.1101/2020.02.27.968537>
- 602 Bhogal, A.A., Siero, J.C., Zwanenburg, J., Luijten, P.R., Philippens, M.E., Hoogduin, H., 2017. Quantitative  
603 T1 mapping under precisely controlled graded hyperoxia at 7T. *J. Cereb. Blood Flow Metab.* 37,  
604 1461–1469. <https://doi.org/10.1177/0271678X16656864>
- 605 Bright, M.G., Bulte, D.P., Jezzard, P., Duyn, J.H., 2009. Characterization of regional heterogeneity in  
606 cerebrovascular reactivity dynamics using novel hypocapnia task and BOLD fMRI. *Neuroimage* 48,  
607 166–75. <https://doi.org/10.1016/j.neuroimage.2009.05.026>
- 608 Cabeza, R., Albert, M., Belleville, S., Craik, F.I.M., Duarte, A., Grady, C.L., Lindenberger, U., Nyberg, L.,  
609 Park, D.C., Reuter-Lorenz, P.A., Rugg, M.D., Steffener, J., Rajah, M.N., 2018. Maintenance, reserve  
610 and compensation: the cognitive neuroscience of healthy ageing. *Nat. Rev. Neurosci.* 19, 701–  
611 710. <https://doi.org/10.1038/s41583-018-0068-2>
- 612 Calhoun, V.D., Adali, T., 2008. ICA for Fusion of Brain Imaging Data, in: *Signal Processing Techniques for*  
613 *Knowledge Extraction and Information Fusion*. Springer US, Boston, MA, pp. 221–240.  
614 [https://doi.org/10.1007/978-0-387-74367-7\\_12](https://doi.org/10.1007/978-0-387-74367-7_12)
- 615 Calhoun, V.D., Maciejewski, P.K., Pearlson, G.D., Kiehl, K.A., 2008. Temporal lobe and “default”  
616 hemodynamic brain modes discriminate between schizophrenia and bipolar disorder. *Hum. Brain*  
617 *Mapp.* 29, 1265–1275. <https://doi.org/10.1002/hbm.20463>
- 618 Campbell, K.L., Shafto, M.A., Wright, P., Tsvetanov, K.A., Geerligs, L., Cusack, R., Tyler, L.K.L.K., Brayne,  
619 C., Bullmore, E.E., Calder, A., Dalgleish, T., Duncan, J., Henson, R., Matthews, F., Marslen-Wilson,  
620 W., Rowe, J., Cheung, T., Davis, S., Kievit, R., McCarrey, A., Price, D., Taylor, J., Williams, N., Bates,  
621 L., Emery, T., Erzinçlioglu, S., Gadie, A., Gerbase, S., Georgieva, S., Hanley, C., Parkin, B., Troy, D.,  
622 Allen, J., Amery, G., Amunts, L., Barcroft, A., Castle, A., Dias, C., Dowrick, J., Fair, M., Fisher, H.,  
623 Goulding, A., Grewal, A., Hale, G., Hilton, A., Johnson, F., Johnston, P., Kavanagh-Williamson, T.,  
624 Kwasniewska, M., McMinn, A., Norman, K., Penrose, J., Roby, F., Rowland, D., Sargeant, J., Squire,  
625 M., Stevens, B., Stoddart, A., Stone, C., Thompson, T., Yazlik, O., Dixon, M., Barnes, D., Hillman, J.,  
626 Mitchell, J., Villis, L., 2015. Idiosyncratic responding during movie-watching predicted by age  
627 differences in attentional control. *Neurobiol. Aging* 36, 3045–3055.  
628 <https://doi.org/10.1016/j.neurobiolaging.2015.07.028>
- 629 Chang, C., Cunningham, J.P., Glover, G.H., 2009. Influence of heart rate on the BOLD signal: the cardiac

- 630 response function. *Neuroimage* 44, 857–69. <https://doi.org/10.1016/j.neuroimage.2008.09.029>
- 631 Chang, C., Metzger, C.D., Glover, G.H., Duyn, J.H., Heinze, H.-J., Walter, M., 2013. Association between  
632 heart rate variability and fluctuations in resting-state functional connectivity. *Neuroimage* 68, 93–  
633 104. <https://doi.org/10.1016/j.neuroimage.2012.11.038>
- 634 Chen, J.J., Rosas, H.D., Salat, D.H., 2011. Age-associated reductions in cerebral blood flow are  
635 independent from regional atrophy. *Neuroimage* 55, 468–78.  
636 <https://doi.org/10.1016/j.neuroimage.2010.12.032>
- 637 Chen, W., Bao, W., Begum, S., Elkasabany, A., Srinivasan, S.R., Berenson, G.S., 2000. Age-related  
638 patterns of the clustering of cardiovascular risk variables of syndrome X from childhood to young  
639 adulthood in a population made up of black and white subjects: the Bogalusa Heart Study.  
640 *Diabetes* 49, 1042–8. <https://doi.org/10.2337/diabetes.49.6.1042>
- 641 Clement, P., Mutsaerts, H.-J., Václavů, L., Ghariq, E., Pizzini, F.B., Smits, M., Acou, M., Jovicich, J.,  
642 Vanninen, R., Kononen, M., Wiest, R., Rostrup, E., Bastos-Leite, A.J., Larsson, E.-M., Achten, E.,  
643 2018. Variability of physiological brain perfusion in healthy subjects – A systematic review of  
644 modifiers. Considerations for multi-center ASL studies. *J. Cereb. Blood Flow Metab.* 38, 1418–  
645 1437. <https://doi.org/10.1177/0271678X17702156>
- 646 Cusack, R., Vicente-Grabovetsky, A., Mitchell, D.J., Wild, C.J., Auer, T., Linke, A.C., Peelle, J.E., 2014.  
647 Automatic analysis (aa): efficient neuroimaging workflows and parallel processing using Matlab  
648 and XML. *Front. Neuroinform.* 8, 90. <https://doi.org/10.3389/fninf.2014.00090>
- 649 Dai, W., Fong, T., Jones, R.N., Marcantonio, E., Schmitt, E., Inouye, S.K., Alsop, D.C., 2017. Effects of  
650 arterial transit delay on cerebral blood flow quantification using arterial spin labeling in an elderly  
651 cohort. *J. Magn. Reson. Imaging* 45, 472–481. <https://doi.org/10.1002/jmri.25367>
- 652 Davis, T.L., Kwong, K.K., Weisskoff, R.M., Rosen, B.R., 1998. Calibrated functional MRI: Mapping the  
653 dynamics of oxidative metabolism. *Proc. Natl. Acad. Sci. U. S. A.* 95, 1834–1839.  
654 <https://doi.org/10.1073/pnas.95.4.1834>
- 655 Detre, J.A., Rao, H., Wang, D.J.J., Chen, Y.F., Wang, Z., 2012. Applications of arterial spin labeled MRI in  
656 the brain. *J. Magn. Reson. Imaging* 35, 1026–1037. <https://doi.org/10.1002/jmri.23581>
- 657 Di, X., Kannurpatti, S.S., Rypma, B., Biswal, B.B., 2012. Calibrating BOLD fMRI Activations with  
658 Neurovascular and Anatomical Constraints. *Cereb. cortex* 1817, 1–9.  
659 <https://doi.org/10.1093/cercor/bhs001>
- 660 Eckert, M.A., Keren, N.I., Roberts, D.R., Calhoun, V.D., Harris, K.C., 2010. Age-related changes in  
661 processing speed: unique contributions of cerebellar and prefrontal cortex. *Front. Hum. Neurosci.*  
662 4, 10. <https://doi.org/10.3389/neuro.09.010.2010>
- 663 Erhardt, E.B., Rachakonda, S., Bedrick, E.J., Allen, E.A., Adali, T., Calhoun, V.D., 2011. Comparison of  
664 multi-subject ICA methods for analysis of fMRI data. *Hum. Brain Mapp.* 32, 2075–2095.  
665 <https://doi.org/10.1002/hbm.21170>
- 666 Fink, E.L., 2009. The FAQs on Data Transformation. *Commun. Monogr.* 76, 379–397.  
667 <https://doi.org/10.1080/03637750903310352>
- 668 Folstein, M.F., Folstein, S.E., McHugh, P.R., 1975. “Mini-mental state”. A practical method for grading  
669 the cognitive state of patients for the clinician. *J. Psychiatr. Res.* 12, 189–198.  
670 [https://doi.org/10.1016/0022-3956\(75\)90026-6](https://doi.org/10.1016/0022-3956(75)90026-6)
- 671 Friston, K.J., Ashburner, J., Kiebel, S., Nichols, T., Penny, W.D., 2007. *Statistical parametric mapping :  
672 the analysis of functional brain images.* Elsevier Academic Press.

- 673 Friston, K.J., Harrison, L., Penny, W., 2003. Dynamic causal modelling. *Neuroimage* 19, 1273–1302.  
674 [https://doi.org/10.1016/S1053-8119\(03\)00202-7](https://doi.org/10.1016/S1053-8119(03)00202-7)
- 675 Fuhrmann, D., Nesbitt, D., Shafto, M.A., Cam-CAN, Kievit, R.A., 2017. Cardiovascular Problems Predict  
676 Poorer White Matter Health in the CamCAN Adult Lifespan Cohort.
- 677 Fukunaga, M., Li, T.-Q., van Gelderen, P., de Zwart, J.A., Shmueli, K., Yao, B., Lee, J., Maric, D., Aronova,  
678 M.A., Zhang, G., Leapman, R.D., Schenck, J.F., Merkle, H., Duyn, J.H., 2010. Layer-specific variation  
679 of iron content in cerebral cortex as a source of MRI contrast. *Proc. Natl. Acad. Sci. U. S. A.* 107,  
680 3834–9. <https://doi.org/10.1073/pnas.0911177107>
- 681 Garrett, D.D., Lindenberger, U., Hoge, R.D., Gauthier, C.J., 2017. Age differences in brain signal  
682 variability are robust to multiple vascular controls. *Sci. Rep.* 7, 10149.  
683 <https://doi.org/10.1038/s41598-017-09752-7>
- 684 Ge, Q., Peng, W., Zhang, J., Weng, X., Zhang, Y., Liu, T., Zang, Y.-F., Wang, Z., 2017. Short-term apparent  
685 brain tissue changes are contributed by cerebral blood flow alterations. *PLoS One* 12, e0182182.  
686 <https://doi.org/10.1371/journal.pone.0182182>
- 687 Geerligs, L., Tsvetanov, K.A., 2016. The use of resting state data in an integrative approach to studying  
688 neurocognitive ageing – Commentary on Campbell and Schacter (2016). *Lang. Cogn. Neurosci.* 32.  
689 <https://doi.org/http://dx.doi.org/10.1080/23273798.2016.1251600>
- 690 Geerligs, L., Tsvetanov, K.A., Cam-Can, Henson, R.N., 2017. Challenges in measuring individual  
691 differences in functional connectivity using fMRI: The case of healthy aging. *Hum. Brain Mapp.*  
692 <https://doi.org/10.1002/hbm.23653>
- 693 Geyer, S., Weiss, M., Reimann, K., Lohmann, G., Turner, R., 2011. Microstructural Parcellation of the  
694 Human Cerebral Cortex - From Brodmann's Post-Mortem Map to in vivo Mapping with High-Field  
695 Magnetic Resonance Imaging. *Front. Hum. Neurosci.* 5, 19.  
696 <https://doi.org/10.3389/fnhum.2011.00019>
- 697 Girouard, H., Iadecola, C., 2006. Neurovascular coupling in the normal brain and in hypertension, stroke,  
698 and Alzheimer disease. *J. Appl. Physiol.* <https://doi.org/10.1152/jappphysiol.00966.2005>
- 699 Glasser, M.F., Van Essen, D.C., 2011. Mapping human cortical areas in vivo based on myelin content as  
700 revealed by T1- and T2-weighted MRI. *J. Neurosci.* 31, 11597–616.  
701 <https://doi.org/10.1523/JNEUROSCI.2180-11.2011>
- 702 Glover, G.H., Shmueli, K., van Gelderen, P., de Zwart, J. a, Horovitz, S.G., Fukunaga, M., Jansma, J.M.,  
703 Duyn, J.H., 2007. Low-frequency fluctuations in the cardiac rate as a source of variance in the  
704 resting-state fMRI BOLD signal. *Neuroimage* 38, 306–20.  
705 <https://doi.org/10.1016/j.neuroimage.2007.07.037>
- 706 Goldberger, A.L., Amaral, L.A.N., Glass, L., Hausdorff, J.M., Ivanov, P.C., Mark, R.G., Mietus, J.E., Moody,  
707 G.B., Peng, C.-K., Stanley, H.E., 2000. PhysioBank, PhysioToolkit, and PhysioNet. *Circulation* 101.  
708 <https://doi.org/10.1161/01.CIR.101.23.e215>
- 709 Golestani, A.M., Chang, C., Kwinta, J.B., Khatamian, Y.B., Jean Chen, J., 2015. Mapping the end-tidal CO2  
710 response function in the resting-state BOLD fMRI signal: Spatial specificity, test–retest reliability  
711 and effect of fMRI sampling rate. *Neuroimage* 104, 266–277.  
712 <https://doi.org/10.1016/j.neuroimage.2014.10.031>
- 713 Golestani, A.M., Wei, L.L., Chen, J.J., 2016. Quantitative mapping of cerebrovascular reactivity using  
714 resting-state BOLD fMRI: Validation in healthy adults. *Neuroimage* 138, 147–163.  
715 <https://doi.org/10.1016/j.neuroimage.2016.05.025>

- 716 Goodman, E., Dolan, L.M., Morrison, J.A., Daniels, S.R., 2005. Factor Analysis of Clustered Cardiovascular  
717 Risks in Adolescence. *Circulation* 111, 1970–1977.  
718 <https://doi.org/10.1161/01.CIR.0000161957.34198.2B>
- 719 Grady, C.L., Garrett, D.D., 2013. Understanding variability in the BOLD signal and why it matters for  
720 aging. *Brain Imaging Behav.* <https://doi.org/10.1007/s11682-013-9253-0>
- 721 Green, E., Bennett, H., Brayne, C., Tyler, L.K., Bullmore, E.T., Calder, A.C., Cusack, R., Dalgleish, T.,  
722 Duncan, J., Henson, R.N., Marslen-Wilson, W.D., Rowe, J.B., Shafto, M.A., Campbell, K., Cheung,  
723 T., Davis, S., Geerligs, L., Kievit, R., McCarrey, A., Mustafa, A., Price, D., Samu, D., Taylor, J.R.,  
724 Treder, M., Tsvetanov, K., Van Belle, J., Williams, N., Bates, L., Emery, T., Erzinçlioglu, S., Gadie, A.,  
725 Gerbase, S., Georgieva, S., Hanley, C., Parkin, B., Troy, D., Auer, T., Correia, M., Gao, L., Henriques,  
726 R., Allen, J., Amery, G., Amunts, L., Barcroft, A., Castle, A., Dias, C., Dowrick, J., Fair, M., Fisher, H.,  
727 Goulding, A., Grewal, A., Hale, G., Hilton, A., Johnson, F., Johnston, P., Kavanagh-Williamson, T.,  
728 Kwasniewska, M., McMinn, A., Norman, K., Penrose, J., Roby, F., Rowland, D., Sargeant, J., Squire,  
729 M., Stevens, B., Stoddart, A., Stone, C., Thompson, T., Yazlik, O., Barnes, D., Dixon, M., Hillman, J.,  
730 Mitchell, J., Willis, L., Matthews, F.E., 2018. Exploring patterns of response across the lifespan: The  
731 Cambridge Centre for Ageing and Neuroscience (Cam-CAN) study. *BMC Public Health* 18.  
732 <https://doi.org/10.1186/s12889-018-5663-7>
- 733 Gu, T., Fu, C., Shen, Z., Guo, H., Zou, M., Chen, M., Rockwood, K., Song, X., 2019. Age-Related Whole-  
734 Brain Structural Changes in Relation to Cardiovascular Risks Across the Adult Age Spectrum. *Front.*  
735 *Aging Neurosci.* 11, 85. <https://doi.org/10.3389/fnagi.2019.00085>
- 736 Hall, E.L., Driver, I.D., Croal, P.L., Francis, S.T., Gowland, P. a, Morris, P.G., Brookes, M.J., 2011. The effect  
737 of hypercapnia on resting and stimulus induced MEG signals. *Neuroimage* 58, 1034–43.  
738 <https://doi.org/10.1016/j.neuroimage.2011.06.073>
- 739 Hallquist, M.N., Hwang, K., Luna, B., 2013. The nuisance of nuisance regression: spectral  
740 misspecification in a common approach to resting-state fMRI preprocessing reintroduces noise  
741 and obscures functional connectivity. *Neuroimage* 82, 208–25.  
742 <https://doi.org/10.1016/j.neuroimage.2013.05.116>
- 743 Handwerker, D. a, Gazzaley, A., Inglis, B. a, D’Esposito, M., 2007. Reducing vascular variability of fMRI  
744 data across aging populations using a breathholding task. *Hum. Brain Mapp.* 28, 846–59.  
745 <https://doi.org/10.1002/hbm.20307>
- 746 Hoge, R.D., Atkinson, J., Gill, B., Crelier, G.R., Marrett, S., Pike, G.B., 1999a. Investigation of BOLD signal  
747 dependence on cerebral blood flow and oxygen consumption: The deoxyhemoglobin dilution  
748 model. *Magn. Reson. Med.* 42, 849–863. [https://doi.org/10.1002/\(SICI\)1522-  
749 2594\(199911\)42:5<849::AID-MRM4>3.0.CO;2-Z](https://doi.org/10.1002/(SICI)1522-2594(199911)42:5<849::AID-MRM4>3.0.CO;2-Z)
- 750 Hoge, R.D., Atkinson, J., Gill, B., Crelier, G.R., Marrett, S., Pike, G.B., 1999b. Linear coupling between  
751 cerebral blood flow and oxygen consumption in activated human cortex. *Proc. Natl. Acad. Sci. U.*  
752 *S. A.* 96, 9403–9408. <https://doi.org/10.1073/pnas.96.16.9403>
- 753 Hui, M., Li, J., Wen, X., Yao, L., Long, Z., 2011. An empirical comparison of information-theoretic criteria  
754 in estimating the number of independent components of fMRI data. *PLoS One* 6, e29274.  
755 <https://doi.org/10.1371/journal.pone.0029274>
- 756 Jafarian, A., Litvak, V., Cagnan, H., Friston, K.J., Zeidman, P., 2020. Comparing dynamic causal models of  
757 neurovascular coupling with fMRI and EEG/MEG. *Neuroimage* 216, 116734.  
758 <https://doi.org/10.1016/j.neuroimage.2020.116734>
- 759 Jahanian, H., Christen, T., Moseley, M.E., Pajewski, N.M., Wright, C.B., Tamura, M.K., Zaharchuk, G.,  
760 Group, for the S.S.R., 2017. Measuring vascular reactivity with resting-state blood oxygenation

- 761 level-dependent (BOLD) signal fluctuations: A potential alternative to the breath-holding  
762 challenge? *J. Cereb. Blood Flow Metab.* 37, 2526–2538.  
763 <https://doi.org/10.1177/0271678X16670921>
- 764 Jahanian, H., Ni, W.W., Christen, T., Moseley, M.E., Kurella Tamura, M., Zaharchuk, G., 2014.  
765 Spontaneous BOLD signal fluctuations in young healthy subjects and elderly patients with chronic  
766 kidney disease. *PLoS One* 9, e92539. <https://doi.org/10.1371/journal.pone.0092539>
- 767 Jenkinson, M., Bannister, P., Brady, M., Smith, S., 2002. Improved optimization for the robust and  
768 accurate linear registration and motion correction of brain images. *Neuroimage* 17, 825–41.
- 769 Kalcher, K., Boubela, R.N., Huf, W., Biswal, B.B., Baldinger, P., Sailer, U., Filzmoser, P., Kasper, S., Lamm,  
770 C., Lanzenberger, R., Moser, E., Windischberger, C., 2013. NeuroImage RESCALE : Voxel-specific  
771 task-fMRI scaling using resting state fluctuation amplitude. *Neuroimage* 70, 80–88.  
772 <https://doi.org/10.1016/j.neuroimage.2012.12.019>
- 773 Kannurpatti, S.S., Biswal, B.B., 2008. Detection and scaling of task-induced fMRI-BOLD response using  
774 resting state fluctuations. *Neuroimage* 40, 1567–74.  
775 <https://doi.org/10.1016/j.neuroimage.2007.09.040>
- 776 Kannurpatti, S.S., Motes, M. a, Rypma, B., Biswal, B.B., 2011. Increasing measurement accuracy of age-  
777 related BOLD signal change: minimizing vascular contributions by resting-state-fluctuation-of-  
778 amplitude scaling. *Hum. Brain Mapp.* 32, 1125–40. <https://doi.org/10.1002/hbm.21097>
- 779 Kazan, S.M., Mohammadi, S., Callaghan, M.F., Flandin, G., Huber, L., Leech, R., Kennerley, A.,  
780 Windischberger, C., Weiskopf, N., 2016. Vascular autoresizing of fMRI (VasA fMRI) improves  
781 sensitivity of population studies: A pilot study. *Neuroimage* 124, 794–805.  
782 <https://doi.org/10.1016/j.neuroimage.2015.09.033>
- 783 Khader, Y.S., Batieha, A., Jaddou, H., Batieha, Z., El-Khateeb, M., Ajlouni, K., 2011. Factor Analysis of  
784 Cardiometabolic Risk Factors Clustering in Children and Adolescents. *Metab. Syndr. Relat. Disord.*  
785 9, 151–156. <https://doi.org/10.1089/met.2010.0097>
- 786 Krainik, A., Hund-Georgiadis, M., Zysset, S., von Cramon, D.Y., 2005. Regional Impairment of  
787 Cerebrovascular Reactivity and BOLD Signal in Adults After Stroke. *Stroke* 36, 1146–1152.  
788 <https://doi.org/10.1161/01.STR.0000166178.40973.a7>
- 789 Kumral, D., Şansal, F., Cesnaite, E., Mahjoory, K., Al, E., Gaebler, M., Nikulin, V. V., Villringer, A., 2019.  
790 BOLD and EEG Signal Variability at Rest Differently Relate to Aging in the Human Brain. *bioRxiv*  
791 646273. <https://doi.org/10.1101/646273>
- 792 Lee, H.-Y., Oh, B.-H., 2010. Aging and arterial stiffness. *Circ. J.* 74, 2257–62.
- 793 Li, Y.-O., Adali, T., Calhoun, V.D., 2007. Estimating the number of independent components for  
794 functional magnetic resonance imaging data. *Hum. Brain Mapp.* 28, 1251–66.  
795 <https://doi.org/10.1002/hbm.20359>
- 796 Liau, J., Liu, T.T., 2009. Inter-subject variability in hypercapnic normalization of the BOLD fMRI response.  
797 *Neuroimage* 45, 420–30. <https://doi.org/10.1016/j.neuroimage.2008.11.032>
- 798 Lindquist, M.A., Geuter, S., Wager, T.D., Caffo, B.S., 2019. Modular preprocessing pipelines can  
799 reintroduce artifacts into fMRI data. *Hum. Brain Mapp.* 40, 2358–2376.  
800 <https://doi.org/10.1002/hbm.24528>
- 801 Lipp, I., Murphy, K., Caseras, X., Wise, R.G., 2015. Agreement and repeatability of vascular reactivity  
802 estimates based on a breath-hold task and a resting state scan. *Neuroimage* 113, 387–396.  
803 <https://doi.org/10.1016/j.neuroimage.2015.03.004>



- 804 Liu, K., Yao, S., Chen, K., Zhang, J., Yao, L., Li, K., Jin, Z., Guo, X., 2017. Structural Brain Network Changes  
805 across the Adult Lifespan. *Front. Aging Neurosci.* 9, 275.  
806 <https://doi.org/10.3389/fnagi.2017.00275>
- 807 Liu, P., De Vis, J.B., Lu, H., 2019. Cerebrovascular reactivity (CVR) MRI with CO<sub>2</sub> challenge: A technical  
808 review. *Neuroimage* 187, 104–115. <https://doi.org/10.1016/j.NEUROIMAGE.2018.03.047>
- 809 Liu, P., Hebrank, A.C., Rodrigue, K.M., Kennedy, K.M., Park, D.C., Lu, H., 2012. A comparison of  
810 physiologic modulators of fMRI signals. *Hum. Brain Mapp.* 00, 2078–88.  
811 <https://doi.org/10.1002/hbm.22053>
- 812 Liu, P., Hebrank, A.C., Rodrigue, K.M., Kennedy, K.M., Section, J., Park, D.C., Lu, H., 2013. Age-related  
813 differences in memory-encoding fMRI responses after accounting for decline in vascular  
814 reactivity. *Neuroimage* 78, 415–25. <https://doi.org/10.1016/j.neuroimage.2013.04.053>
- 815 Liu, P., Li, Y., Pinho, M., Park, D.C., Welch, B.G., Lu, H., 2017. Cerebrovascular reactivity mapping without  
816 gas challenges. *Neuroimage* 146, 320–326. <https://doi.org/10.1016/j.neuroimage.2016.11.054>
- 817 Logothetis, N.K., 2008. What we can do and what we cannot do with fMRI. *Nature* 453, 869–878.  
818 <https://doi.org/10.1038/nature06976>
- 819 Lu, H., Yezhuvath, U.S., Xiao, G., 2010. Improving fMRI sensitivity by normalization of basal physiologic  
820 state. *Hum. Brain Mapp.* 31, 80–7. <https://doi.org/10.1002/hbm.20846>
- 821 Magon, S., Basso, G., Farace, P., Ricciardi, G.K., Beltramello, A., Sbarbati, A., 2009. Reproducibility of  
822 BOLD signal change induced by breath holding. *Neuroimage* 45, 702–712.  
823 <https://doi.org/10.1016/j.NEUROIMAGE.2008.12.059>
- 824 Makedonov, I., Black, S.E., Macintosh, B.J., 2013. BOLD fMRI in the white matter as a marker of aging  
825 and small vessel disease. *PLoS One* 8, e67652. <https://doi.org/10.1371/journal.pone.0067652>
- 826 Malik, M., Bigger, J.T., Camm, A.J., Kleiger, R.E., Malliani, A., Moss, A.J., Schwartz, P.J., 1996. Heart rate  
827 variability: Standards of measurement, physiological interpretation, and clinical use. *Eur. Heart J.*  
828 17, 354–381. <https://doi.org/10.1093/oxfordjournals.eurheartj.a014868>
- 829 Mayer-Davis, E.J., Ma, B., Lawson, A., D’Agostino, R.B., Liese, A.D., Bell, R.A., Dabelea, D., Dolan, L.,  
830 Pettitt, D.J., Rodriguez, B.L., Williams, D., SEARCH for Diabetes in Youth Study Group, D., 2009.  
831 Cardiovascular disease risk factors in youth with type 1 and type 2 diabetes: implications of a  
832 factor analysis of clustering. *Metab. Syndr. Relat. Disord.* 7, 89–95.  
833 <https://doi.org/10.1089/met.2008.0046>
- 834 Mayhew, S.D., Li, S., Storrar, J.K., Tsvetanov, K.A., Kourtzi, Z., 2010. Learning shapes the representation  
835 of visual categories in the aging human brain. *J. Cogn. Neurosci.* 22.  
836 <https://doi.org/10.1162/jocn.2010.21415>
- 837 Millar, P.R., Petersen, S.E., Ances, B.M., Gordon, B.A., Benzinger, T.L.S., Morris, J.C., Balota, D.A., 2020.  
838 Evaluating the Sensitivity of Resting-State BOLD Variability to Age and Cognition after Controlling  
839 for Motion and Cardiovascular Influences: A Network-Based Approach. *Cereb. Cortex* 00, 1–16.  
840 <https://doi.org/10.1093/cercor/bhaa138>
- 841 Mohajer, B., Abbasi, N., Mohammadi, E., Khazaie, H., Osorio, R.S., Rosenzweig, I., Eickhoff, C.R., Zarei,  
842 M., Tahmasian, M., Eickhoff, S.B., 2020. Gray matter volume and estimated brain age gap are not  
843 linked with <sc>sleep-disordered</sc> breathing. *Hum. Brain Mapp.* hbm.24995.  
844 <https://doi.org/10.1002/hbm.24995>
- 845 Mueller, S., Wang, D., Fox, M.D., Yeo, B.T.T., Sepulcre, J., Sabuncu, M.R., Shafee, R., Lu, J., Liu, H., 2013.  
846 Individual Variability in Functional Connectivity Architecture of the Human Brain. *Neuron* 77, 586–

- 847 595. <https://doi.org/10.1016/j.neuron.2012.12.028>
- 848 Mutsaerts, H.J., Petr, J., Václavů, L., van Dalen, J.W., Robertson, A.D., Caan, M.W., Masellis, M.,  
849 Nederveen, A.J., Richard, E., MacIntosh, B.J., 2017. The spatial coefficient of variation in arterial  
850 spin labeling cerebral blood flow images. *J. Cereb. Blood Flow Metab.* 37, 3184–3192.  
851 <https://doi.org/10.1177/0271678X16683690>
- 852 Mutsaerts, H.J.M.M., Petr, J., Thomas, D.L., De Vita, E., Cash, D.M., van Osch, M.J.P., Golay, X., Groot,  
853 P.F.C., Ourselin, S., van Swieten, J., Laforce, R., Tagliavini, F., Borroni, B., Galimberti, D., Rowe, J.B.,  
854 Graff, C., Pizzini, F.B., Finger, E., Sorbi, S., Castelo Branco, M., Rohrer, J.D., Masellis, M., MacIntosh,  
855 B.J., GENFI investigators, 2018. Comparison of arterial spin labeling registration strategies in the  
856 multi-center GENetic frontotemporal dementia initiative (GENFI). *J. Magn. Reson. Imaging* 47,  
857 131–140. <https://doi.org/10.1002/jmri.25751>
- 858 O'Rourke, M.F., Hashimoto, J., 2007. Mechanical factors in arterial aging: a clinical perspective. *J. Am.*  
859 *Coll. Cardiol.* 50, 1–13. <https://doi.org/10.1016/j.jacc.2006.12.050>
- 860 Oldfield, R.C., 1971. The assessment and analysis of handedness: the Edinburgh inventory.  
861 *Neuropsychologia* 9, 97–113.
- 862 Passamonti, L, Tsvetanov, K.A., Jones, P.S., Bevan-Jones, W.R., Arnold, R., Borchert, R.J., Mak, E., Su, L.,  
863 O'Brien, J.T., Rowe, J.B., Passamonti, Luca, 2019. Neuroinflammation and functional connectivity  
864 in Alzheimer's disease: interactive influences on cognitive performance. *bioRxiv Prepr.*  
865 <https://doi.org/10.1101/532291>
- 866 Patel, A.X., Kundu, P., Rubinov, M., Simon Jones, P., Vértes, P.E., Ersche, K.D., Suckling, J., Bullmore, E.T.,  
867 2014. A wavelet method for modeling and despiking motion artifacts from resting-state fMRI time  
868 series. *Neuroimage.* <https://doi.org/10.1016/j.neuroimage.2014.03.012>
- 869 Peelle, J.E., Cusack, R., Henson, R.N. a, 2012. Adjusting for global effects in voxel-based morphometry:  
870 Gray matter decline in normal aging. *Neuroimage* 60, 1503–1516.  
871 <https://doi.org/10.1016/j.neuroimage.2011.12.086>
- 872 Restom, K., Bangen, K.J., Bondi, M.W., Perthen, J.E., Liu, T.T., 2007. Cerebral blood flow and BOLD  
873 responses to a memory encoding task: a comparison between healthy young and elderly adults.  
874 *Neuroimage* 37, 430–9. <https://doi.org/10.1016/j.neuroimage.2007.05.024>
- 875 Riecker, A., Grodd, W., Klose, U., Schulz, J.B., Gröschel, K., Erb, M., Ackermann, H., Kastrup, A., 2003.  
876 Relation between regional functional MRI activation and vascular reactivity to carbon dioxide  
877 during normal aging. *J. Cereb. Blood Flow Metab.* 23, 565–73.  
878 <https://doi.org/10.1097/01.WCB.0000056063.25434.04>
- 879 Rissanen, J., 1978. Modeling by shortest data description. *Automatica* 14, 465–471.  
880 [https://doi.org/10.1016/0005-1098\(78\)90005-5](https://doi.org/10.1016/0005-1098(78)90005-5)
- 881 Robertson, A.D., Matta, G., Basile, V.S., Black, S.E., Macgowan, C.K., Detre, J.A., MacIntosh, B.J., 2017.  
882 Temporal and spatial variances in arterial spin-labeling are inversely related to large-artery blood  
883 velocity. *Am. J. Neuroradiol.* 38, 1555–1561. <https://doi.org/10.3174/ajnr.A5257>
- 884 Robertson, A.D., Tessmer, C.F., Hughson, R.L., 2010. Association between arterial stiffness and  
885 cerebrovascular resistance in the elderly. *J. Hum. Hypertens.* 24, 190–196.  
886 <https://doi.org/10.1038/jhh.2009.56>
- 887 Sami, S., Miall, R.C., 2013. Graph network analysis of immediate motor-learning induced changes in  
888 resting state BOLD. *Front. Hum. Neurosci.* 7, 166. <https://doi.org/10.3389/fnhum.2013.00166>
- 889 Sami, S., Robertson, E.M., Miall, R.C., 2014. The time course of task-specific memory consolidation



- 890 effects in resting state networks. *J. Neurosci.* 34, 3982–92.  
891 <https://doi.org/10.1523/JNEUROSCI.4341-13.2014>
- 892 Samu, D., Campbell, K.L., Tsvetanov, K.A., Shafto, M.A., Consortium, C.-C., Brayne, C., Bullmore, E.T.,  
893 Calder, A.C., Cusack, R., Dalgleish, T., Duncan, J., Henson, R.N., Matthews, F.E., Marslen-Wilson,  
894 W.D., Rowe, J.B., Cheung, T., Davis, S., Geerligs, L., Kievit, R., McCarrey, A., Mustafa, A., Price, D.,  
895 Taylor, J.R., Treder, M., Belle, J. van, Williams, N., Bates, L., Emery, T., Erzinçlioglu, S., Gadie, A.,  
896 Gerbase, S., Georgieva, S., Hanley, C., Parkin, B., Troy, D., Auer, T., Correia, M., Gao, L., Green, E.,  
897 Henriques, R., Allen, J., Amery, G., Amunts, L., Barcroft, A., Castle, A., Dias, C., Dowrick, J., Fair, M.,  
898 Fisher, H., Goulding, A., Grewal, A., Hale, G., Hilton, A., Johnson, F., Johnston, P., Kavanagh-  
899 Williamson, T., Kwasniewska, M., McMinn, A., Norman, K., Penrose, J., Roby, F., Rowland, D.,  
900 Sargeant, J., Squire, M., Stevens, B., Stoddart, A., Stone, C., Thompson, T., Yazlik, O., Barnes, D.,  
901 Dixon, M., Hillman, J., Mitchell, J., Villis, L., Tyler, L.K., 2017. Preserved cognitive functions with  
902 age are determined by domain-dependent shifts in network responsivity. *Nat. Commun.* 8,  
903 ncomms14743. <https://doi.org/10.1038/ncomms14743>
- 904 Satterthwaite, T.D., Elliott, M. a, Gerraty, R.T., Ruparel, K., Loughhead, J., Calkins, M.E., Eickhoff, S.B.,  
905 Hakonarson, H., Gur, R.C.R.E., Gur, R.C.R.E., Wolf, D.H., 2013. An improved framework for  
906 confound regression and filtering for control of motion artifact in the preprocessing of resting-  
907 state functional connectivity data. *Neuroimage* 64, 240–56.  
908 <https://doi.org/10.1016/j.neuroimage.2012.08.052>
- 909 Shafto, M.A., Tyler, L.K., Dixon, M., Taylor, J.R., Rowe, J.B., Cusack, R., Calder, A.J., Marslen-Wilson, W.D.,  
910 Duncan, J., Dalgleish, T., Henson, R.N., Brayne, C., Bullmore, E., Campbell, K., Cheung, T., Davis, S.,  
911 Geerligs, L., Kievit, R., McCarrey, A., Price, D., Samu, D., Treder, M., Tsvetanov, K., Williams, N.,  
912 Bates, L., Emery, T., Erzinçlioglu, S., Gadie, A., Gerbase, S., Georgieva, S., Hanley, C., Parkin, B.,  
913 Troy, D., Allen, J., Amery, G., Amunts, L., Barcroft, A., Castle, A., Dias, C., Dowrick, J., Fair, M., Fisher,  
914 H., Goulding, A., Grewal, A., Hale, G., Hilton, A., Johnson, F., Johnston, P., Kavanagh-Williamson,  
915 T., Kwasniewska, M., McMinn, A., Norman, K., Penrose, J., Roby, F., Rowland, D., Sargeant, J.,  
916 Squire, M., Stevens, B., Stoddart, A., Stone, C., Thompson, T., Yazlik, O., Barnes, D., Hillman, J.,  
917 Mitchell, J., Villis, L., Matthews, F.E., 2014. The Cambridge Centre for Ageing and Neuroscience  
918 (Cam-CAN) study protocol: A cross-sectional, lifespan, multidisciplinary examination of healthy  
919 cognitive ageing. *BMC Neurol.* 14. <https://doi.org/10.1186/s12883-014-0204-1>
- 920 Skinner, H.A., 1982. The drug abuse screening test. *Addict. Behav.* 7, 363–71.
- 921 Snellen, H., 1862. *Probabuchstaben zur bestimmung der sehscharfe.* Van de Weijer, Utrecht.
- 922 Srinivasa, R.N., Rossetti, H.C., Gupta, M.K., Rosenberg, R.N., Weiner, M.F., Peshock, R.M., McColl, R.W.,  
923 Hynan, L.S., Lucarelli, R.T., King, K.S., 2016. Cardiovascular Risk Factors Associated with Smaller  
924 Brain Volumes in Regions Identified as Early Predictors of Cognitive Decline. *Radiology* 278, 198–  
925 204. <https://doi.org/10.1148/radiol.2015142488>
- 926 Sui, J., Adali, T., Yu, Q., Chen, J., Calhoun, V.D., 2012. A review of multivariate methods for multimodal  
927 fusion of brain imaging data. *J. Neurosci. Methods* 204, 68–81.  
928 <https://doi.org/10.1016/j.jneumeth.2011.10.031>
- 929 Tardif, C.L., Steele, C.J., Lampe, L., Bazin, P.-L., Ragert, P., Villringer, A., Gauthier, C.J., 2017. Investigation  
930 of the confounding effects of vasculature and metabolism on computational anatomy studies.  
931 *Neuroimage* 149, 233–243. <https://doi.org/10.1016/J.NEUROIMAGE.2017.01.025>
- 932 Tarumi, T., Ayaz Khan, M., Liu, J., Tseng, B.M., Parker, R., Riley, J., Tinajero, C., Zhang, R., 2014. Cerebral  
933 hemodynamics in normal aging: central artery stiffness, wave reflection, and pressure pulsatility.  
934 *J. Cereb. Blood Flow Metab.* 34, 971–8. <https://doi.org/10.1038/jcbfm.2014.44>
- 935 Tarumi, T., Zhang, R., 2018. Cerebral blood flow in normal aging adults: cardiovascular determinants,

- 936 clinical implications, and aerobic fitness. *J. Neurochem.* 144, 595–608.  
937 <https://doi.org/10.1111/jnc.14234>
- 938 Taylor, J.R., Williams, N., Cusack, R., Auer, T., Shafto, M.A., Dixon, M., Tyler, L.K., Cam-Can, Henson, R.N.,  
939 2015. The Cambridge Centre for Ageing and Neuroscience (Cam-CAN) data repository: Structural  
940 and functional MRI, MEG, and cognitive data from a cross-sectional adult lifespan sample.  
941 *Neuroimage*. <https://doi.org/10.1016/j.neuroimage.2015.09.018>
- 942 Theyers, A.E., Goldstein, B.I., Metcalfe, A.W., Robertson, A.D., MacIntosh, B.J., 2018. Cerebrovascular  
943 blood oxygenation level dependent pulsatility at baseline and following acute exercise among  
944 healthy adolescents. *J. Cereb. Blood Flow Metab.* 0271678X1876677.  
945 <https://doi.org/10.1177/0271678X18766771>
- 946 Thomason, M.E., Burrows, B.E., Gabrieli, J.D.E., Glover, G.H., 2005. Breath holding reveals differences  
947 in fMRI BOLD signal in children and adults. *Neuroimage* 25, 824–37.  
948 <https://doi.org/10.1016/j.neuroimage.2004.12.026>
- 949 Thomason, M.E., Foland, L.C., Glover, G.H., 2007. Calibration of BOLD fMRI using breath holding reduces  
950 group variance during a cognitive task. *Hum. Brain Mapp.* 28, 59–68.  
951 <https://doi.org/10.1002/hbm.20241>
- 952 Tsvetanov, K.A., Gazzina, S., Jones, S.P., Swieten, J. van, Borroni, B., Sanchez-Valle, R., Moreno, F.,  
953 Laforce, R., Graff, C., Synofzik, M., Galimberti, D., Masellis, M., Tartaglia, M.C., Finger, E.,  
954 Vandenberghe, R., Mendonça, A. de, Tagliavini, F., Santana, I., Ducharme, S., Butler, C., Gerhard,  
955 A., Danek, A., Levin, J., Otto, M., Frisoni, G., Ghidoni, R., Sorbi, S., Rohrer, J.D., Rowe, J.B., (GENFI),  
956 T.G.F.I., 2019. Brain functional network integrity sustains cognitive function despite atrophy in  
957 presymptomatic genetic frontotemporal dementia. *medRxiv* 19012203.  
958 <https://doi.org/10.1101/19012203>
- 959 Tsvetanov, K.A., Henson, R.N.A., Rowe, J.B., 2020. Separating vascular and neuronal effects of age on  
960 fMRI BOLD signals. *Philos. Trans. R. Soc. B Biol. Sci.* <https://doi.org/10.1098/rstb.2019.0631>
- 961 Tsvetanov, K.A., Henson, R.N.A., Tyler, L.K., Davis, S.W., Shafto, M.A., Taylor, J.R., Williams, N., Rowe,  
962 J.B., 2015. The effect of ageing on fMRI: Correction for the confounding effects of vascular  
963 reactivity evaluated by joint fMRI and MEG in 335 adults. *Hum. Brain Mapp.* 36, 2248–2269.  
964 <https://doi.org/10.1002/hbm.22768>
- 965 Tsvetanov, K.A., Henson, R.N.A., Tyler, L.K., Razi, A., Geerligs, L., Ham, T.E., Rowe, J.B., 2016. Extrinsic  
966 and intrinsic brain network connectivity maintains cognition across the lifespan despite  
967 accelerated decay of regional brain activation. *J. Neurosci.* 36, 3115–26.  
968 <https://doi.org/10.1523/JNEUROSCI.2733-15.2016>
- 969 Tsvetanov, K.A., Ye, Z., Hughes, L., Samu, D., Treder, M.S., Wolpe, N., Tyler, L.K., Rowe, J.B., for  
970 Cambridge Centre for Ageing and Neuroscience, 2018. Activity and connectivity differences  
971 underlying inhibitory control across the adult lifespan. *J. Neurosci.* 38, 7887–7900.  
972 <https://doi.org/10.1523/JNEUROSCI.2919-17.2018>
- 973 Varadhan, R., Chaves, P.H.M., Lipsitz, L.A., Stein, P.K., Tian, J., Windham, B.G., Berger, R.D., Fried, L.P.,  
974 2009. Frailty and impaired cardiac autonomic control: new insights from principal components  
975 aggregation of traditional heart rate variability indices. *J. Gerontol. A. Biol. Sci. Med. Sci.* 64, 682–  
976 7. <https://doi.org/10.1093/gerona/glp013>
- 977 Vest, A.N., Da Poian, G., Li, Q., Liu, C., Nemati, S., Shah, A.J., Clifford, G.D., 2018. An open source  
978 benchmarked toolbox for cardiovascular waveform and interval analysis. *Physiol. Meas.* 39,  
979 105004. <https://doi.org/10.1088/1361-6579/aae021>

- 980 Viessmann, O., Möller, H.E., Jezzard, P., 2019. Dual regression physiological modeling of resting-state  
981 EPI power spectra: Effects of healthy aging. *Neuroimage* 187, 68–76.  
982 <https://doi.org/10.1016/J.NEUROIMAGE.2018.01.011>
- 983 Viessmann, O., Möller, H.E., Jezzard, P., 2017. Cardiac cycle-induced EPI time series fluctuations in the  
984 brain: Their temporal shifts, inflow effects and T2\* fluctuations. *Neuroimage* 162, 93–105.  
985 <https://doi.org/10.1016/J.NEUROIMAGE.2017.08.061>
- 986 Wardlaw, J.M., Allerhand, M., Doubal, F.N., Valdes Hernandez, M., Morris, Z., Gow, A.J., Bastin, M.,  
987 Starr, J.M., Dennis, M.S., Deary, I.J., 2014. Vascular risk factors, large-artery atheroma, and brain  
988 white matter hyperintensities. *Neurology* 82, 1331–8.  
989 <https://doi.org/10.1212/WNL.0000000000000312>
- 990 Webb, A.J.S., Rothwell, P.M., 2014. Physiological Correlates of Beat-to-Beat, Ambulatory, and Day-to-  
991 Day Home Blood Pressure Variability After Transient Ischemic Attack or Minor Stroke. *Stroke* 45,  
992 533–538. <https://doi.org/10.1161/STROKEAHA.113.003321>
- 993 Webb, A.J.S., Simoni, M., Mazzucco, S., Kuker, W., Schulz, U., Rothwell, P.M., 2012. Increased Cerebral  
994 Arterial Pulsatility in Patients With Leukoaraiosis. *Stroke* 43, 2631–2636.  
995 <https://doi.org/10.1161/STROKEAHA.112.655837>
- 996 West, K.L., Zuppichini, M.D., Turner, M.P., Sivakolundu, D.K., Zhao, Y., Abdelkarim, D., Spence, J.S.,  
997 Rypma, B., 2019. BOLD hemodynamic response function changes significantly with healthy aging.  
998 *Neuroimage* 188, 198–207. <https://doi.org/10.1016/j.neuroimage.2018.12.012>
- 999 Whittaker, J.R., Driver, I.D., Bright, M.G., Murphy, K., 2016. The absolute CBF response to activation is  
1000 preserved during elevated perfusion: Implications for neurovascular coupling measures.  
1001 *Neuroimage* 125, 198–207. <https://doi.org/10.1016/j.neuroimage.2015.10.023>
- 1002 Xu, J., Potenza, M.N., Calhoun, V.D., 2013. Spatial ICA reveals functional activity hidden from traditional  
1003 fMRI GLM-based analyses. *Front. Neurosci.* 7, 1–4. <https://doi.org/10.3389/fnins.2013.00154>
- 1004 Xu, L., Groth, K.M., Pearlson, G., Schretlen, D.J., Calhoun, V.D., 2009. Source-based morphometry: the  
1005 use of independent component analysis to identify gray matter differences with application to  
1006 schizophrenia. *Hum. Brain Mapp.* 30, 711–24. <https://doi.org/10.1002/hbm.20540>
- 1007 Yezhuvath, U.S., Lewis-Amezcuea, K., Varghese, R., Xiao, G., Lu, H., 2009. On the assessment of  
1008 cerebrovascular reactivity using hypercapnia BOLD MRI. *NMR Biomed.* 22, 779–86.  
1009 <https://doi.org/10.1002/nbm.1392>
- 1010 Zhang, N., Gordon, M.L., Ma, Y., Chi, B., Gomar, J.J., Peng, S., Kingsley, P.B., Eidelberg, D., Goldberg, T.E.,  
1011 2018. The Age-Related Perfusion Pattern Measured With Arterial Spin Labeling MRI in Healthy  
1012 Subjects. *Front. Aging Neurosci.* 10, 214. <https://doi.org/10.3389/fnagi.2018.00214>
- 1013 Zlokovic, B. V, 2011. Neurovascular pathways to neurodegeneration in Alzheimer’s disease and other  
1014 disorders. *Nat. Rev. Neurosci.* 12, 723–38. <https://doi.org/10.1038/nrn3114>
- 1015



1017 7. Tables

1018 *Table 1. Participants' demographic information, grouped by decile in accordance with the original design of the Cam-*  
 1019 *CAN cohort (Green et al., 2018; Shafto et al., 2014)*

|                                    | Decile     |            |            |            |           |            |            | Statistical tests* |         |
|------------------------------------|------------|------------|------------|------------|-----------|------------|------------|--------------------|---------|
|                                    | 1          | 2          | 3          | 4          | 5         | 6          | 7          | $\chi^2$ or F-test | P-value |
| <b>Age range [years]</b>           | 18-27      | 28-37      | 38-47      | 48-57      | 58-67     | 68-77      | 78-90      |                    |         |
| <b>Gender, n (% per decile)</b>    |            |            |            |            |           |            |            | 0.15               | 0.989   |
| Men                                | 7 (46.7)   | 19 (46.3)  | 19 (50)    | 19 (52.8)  | 19 (50)   | 17 (56.7)  | 14 (50)    |                    |         |
| Women                              | 8 (53.3)   | 22 (53.7)  | 19 (50)    | 17 (47.2)  | 19 (50)   | 13 (43.3)  | 14 (50)    |                    |         |
| <b>Handedness**</b>                |            |            |            |            |           |            |            | 1.34               | 0.241   |
| Mean / SD                          | 91 / 12    | 85 / 42    | 86 / 27    | 93 / 11    | 79 / 48   | 97 / 5     | 91 / 30    |                    |         |
| Range [Min/Max]                    | 65 / 100   | -65 / 100  | -56 / 100  | 58 / 100   | -78 / 100 | 86 / 100   | -56 / 100  |                    |         |
| <b>Education, n (% per decile)</b> |            |            |            |            |           |            |            | 4.07               | <.001   |
| None                               | 0 (0)      | 0 (0)      | 0 (0)      | 0 (0)      | 0 (0)     | 5 (16.7)   | 1 (3.6)    |                    |         |
| GCSE/O-level                       | 2 (13.3)   | 1 (2.4)    | 6 (15.8)   | 3 (8.3)    | 4 (10.5)  | 2 (6.7)    | 4 (14.3)   |                    |         |
| A-level                            | 2 (13.3)   | 2 (4.9)    | 3 (7.9)    | 12 (33.3)  | 9 (23.7)  | 9 (30)     | 8 (28.6)   |                    |         |
| Degree                             | 11 (73.3)  | 38 (92.7)  | 29 (76.3)  | 21 (58.3)  | 25 (65.8) | 14 (46.7)  | 15 (53.6)  |                    |         |
| <b>Mini-Mental State Exam</b>      |            |            |            |            |           |            |            | 3.17               | 0.006   |
| Mean / SD                          | 29.5 / 0.9 | 29.6 / 0.7 | 29.1 / 1.2 | 29.2 / 0.9 | 29.1 / 1  | 28.7 / 1.3 | 28.8 / 1.3 |                    |         |
| Range [Min/Max]                    | 27 / 30    | 27 / 30    | 26 / 30    | 26 / 30    | 27 / 30   | 26 / 30    | 25 / 30    |                    |         |

\* Statistical test to indicate whether demographics vary between deciles

\*\* Higher scores indicate greater right-hand preference

1020

1021 *Table 2. Evaluation of the difference in distribution shape across voxels in the whole brain, as well as voxels within*  
 1022 *grey matter (GM), white matter (WM) and cerebrospinal fluid (CSF) areas. Tests showing no difference in the distributions at*  
 1023 *uncorrected p-value 0.05 are indicated by n.s.*

| Model | Whole Brain | GM     | WM    | CSF    |
|-------|-------------|--------|-------|--------|
| 1     | <0.001      | <0.001 | 0.009 | <0.001 |
| 2     | <0.001      | <0.001 | 0.009 | <0.001 |
| 3     | 0.015       | n.s.   | 0.048 | 0.005  |
| 4     | 0.016       | n.s.   | 0.039 | 0.007  |
| 5     | <0.001      | <0.001 | 0.004 | <0.001 |

1024

1025

1026

1027 8. Figures

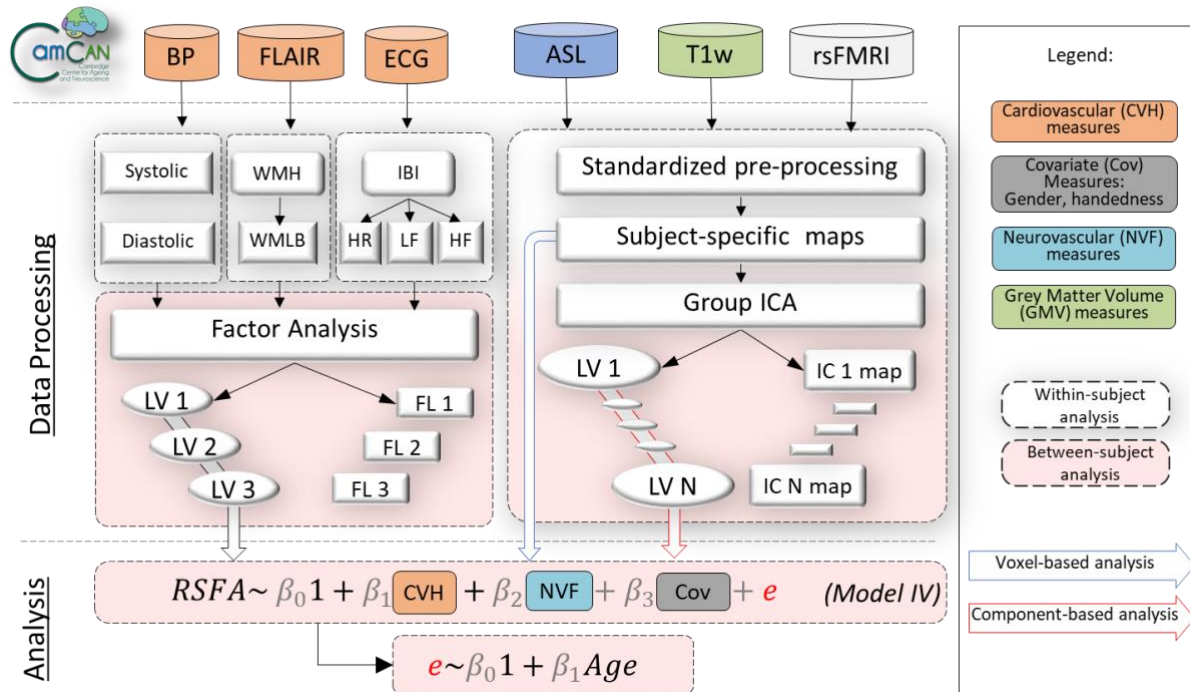

1028

1029 *Figure 1. Visual representation of the analysis strategy in terms of data inclusion (above top dotted line), processing*  
 1030 *(below top dotted line) either at a within-subject level (white dotted-line rectangles) or between-subject level (peach-color*  
 1031 *dotted-line rectangles) and analysis (below second dotted line). Measures of cardiovascular health (CVH) included blood*  
 1032 *pressure (BP), heart rate variability (HRV) from electrocardiogram (ECG) recordings, white matter-matter hyperintensities*  
 1033 *(WMH) from fluid-attenuated inversion recovery (FLAIR) and BMI (not shown), all of which were submitted to factor analysis.*  
 1034 *Neurovascular function (NVF) estimates were based on cerebral blood flow from arterial spin labelling (ASL) acquisition. Grey*  
 1035 *matter volume (GMV) was estimated from a T1-weighted MRI acquisition. Resting state fluctuation amplitudes (RSFA) were*  
 1036 *estimated from resting-state fMRI BOLD acquisition. Regionally specific measures (RSFA, CBF and GMV) were submitted to*  
 1037 *multiple linear regression either on a voxel-level or on a component-level using outputs from group ICA. ICA – independent*  
 1038 *component analysis; LV – latent variable; LST – lesion-segmentation tool; PCA – principal component analysis; rsfMRI – resting*  
 1039 *state fMRI; TLV – total lesion volume; WMLB – white-matter lesion burden;*

1040

1041

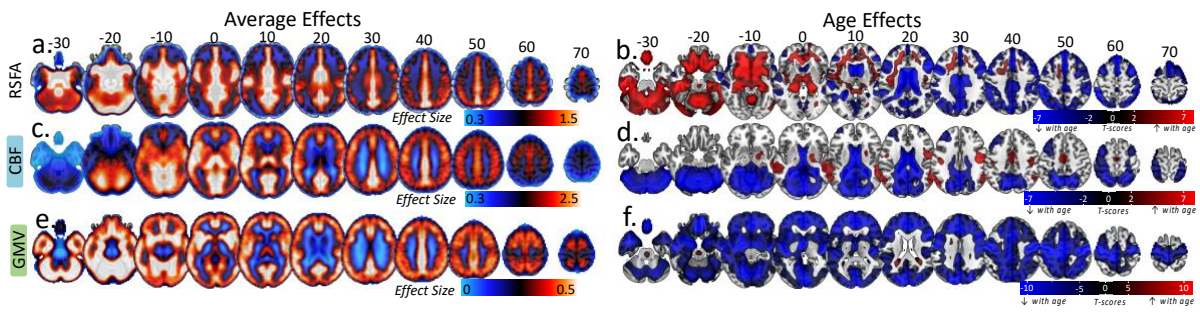

1043 *Figure 2. Average RSFA, CBF and Grey Matter Volume and the effects of age on each modality (SPM{beta} and SPM{t} maps*  
1044 *respectively)*

1045



1046

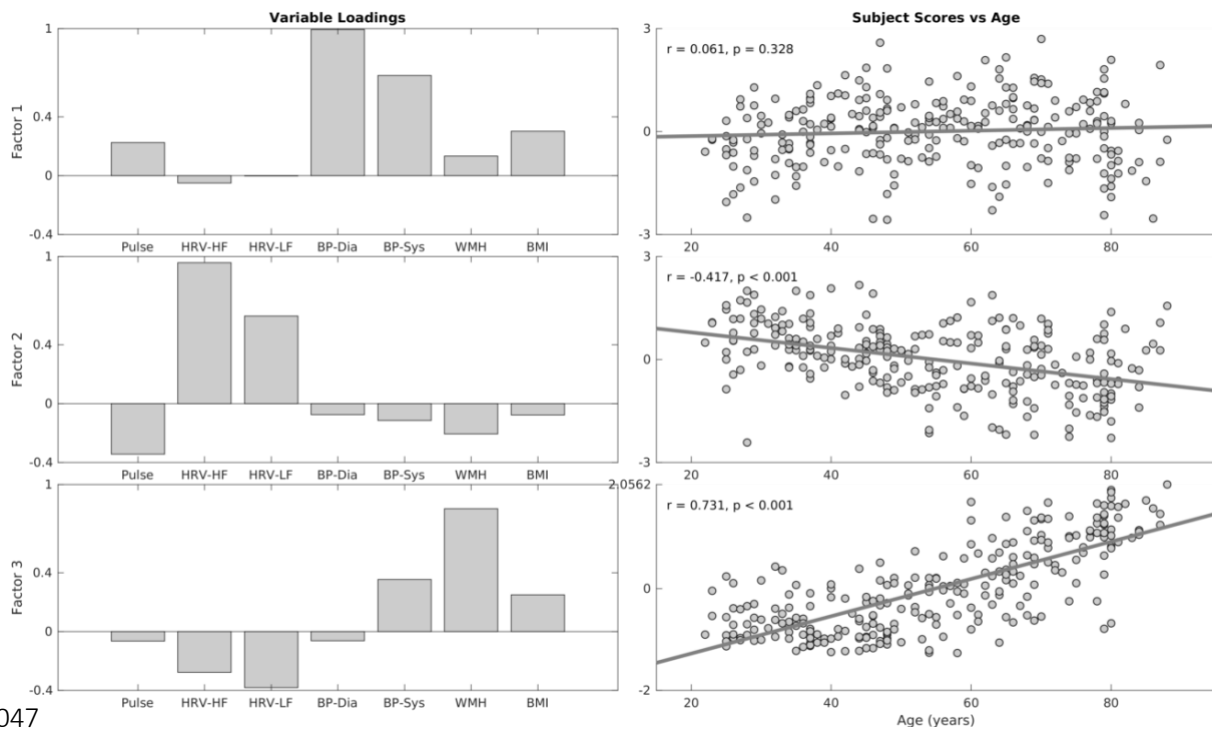

1047

1048

1049 *Figure 3. Variable loadings (left column) and association between age and subjects scores for three factors*

1050 *resulting from factor analysis on cardiovascular risk variables. Pulse – mean heart rate, HRV-HF – high-frequency heart rate*

1051 *variability, HRV-LF – low-frequency high rate variability, BP-Dia – diastolic blood pressure, BP-Sys – systolic blood pressure,*

*WMH – white matter hyperintensities, BMI – body-mass index*

1052



1053

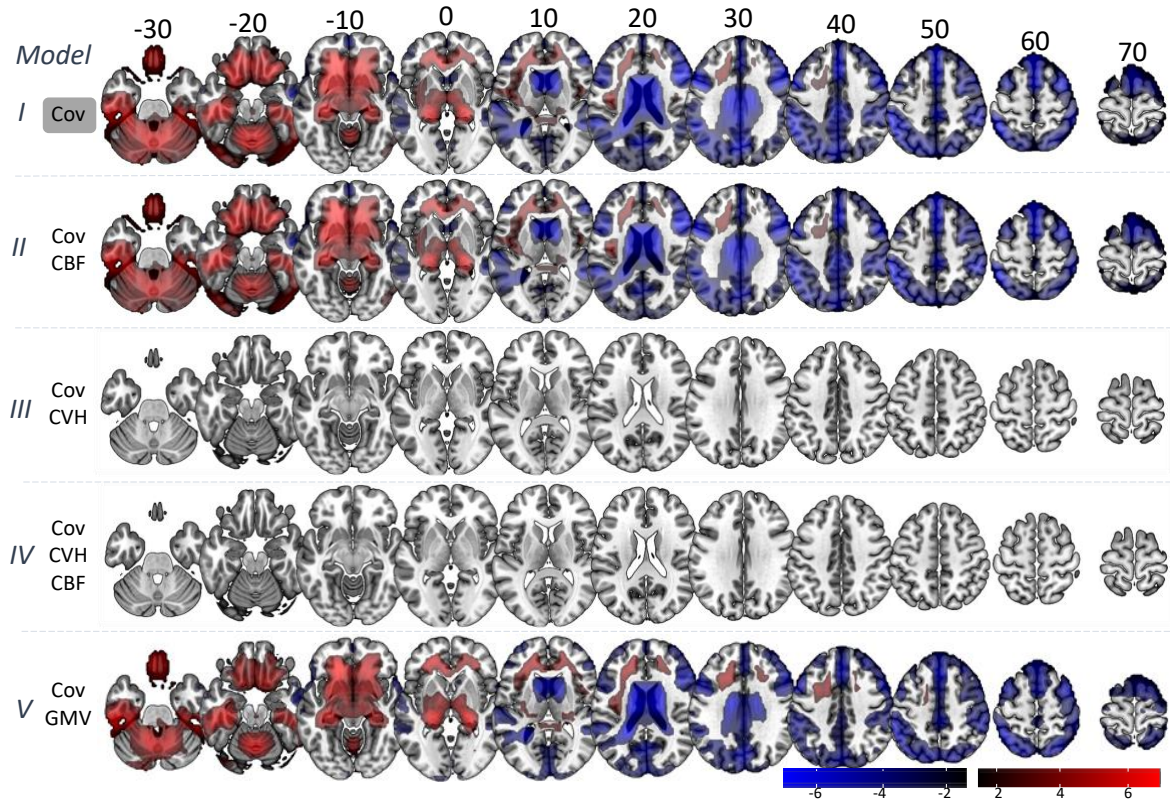

1054

1055 *Figure 4. Voxel-wise associations between age and RSFA residuals after controlling for: covariates only (Cov, Model I); Cov and*  
1056 *cerebral blood flow (CBF, Model II); Cov and cardiovascular health (CVH, Model III); Cov, CBF and CVH (Model IV); and Cov and*  
1057 *grey matter volume (GMV).*

1058

1059

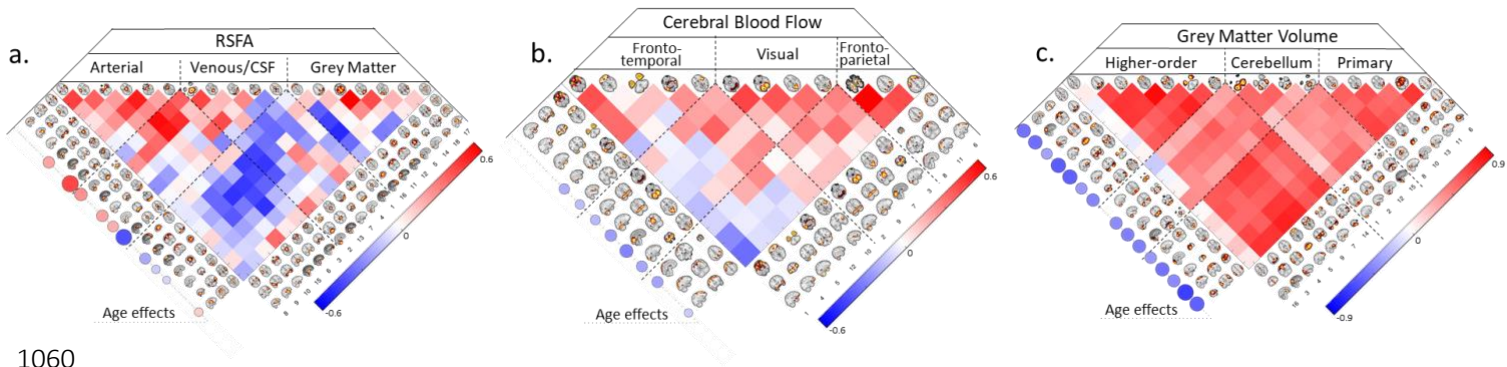

1060

1061 *Figure 5 Independent component analysis spatial maps and correlation between subject loadings for RSFA (a), cerebral*  
1062 *blood flow (b) and grey matter volume (c) datasets. The relationships between age and IC loadings are shown circles on the left*  
1063 *hand-side of each correlation matrix, FDR-adjusted p-value of 0.05.*

1064

1065

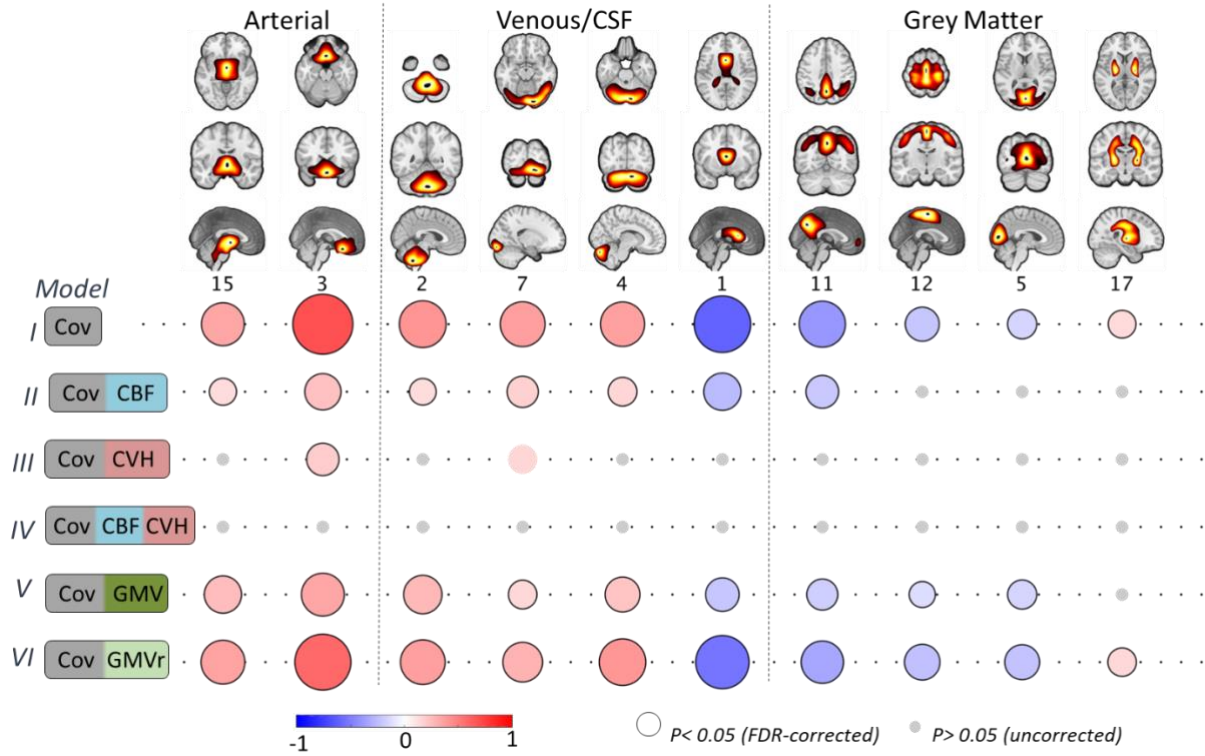

1066

1067

1068

1069

1070

1071

Figure 6. Component-based associations between age and RSFA residuals after controlling for: covariates only (Cov, Model I); Cov and cerebral blood flow (CBF, Model II); Cov and cardiovascular health (CVH, Model III); Cov, CBF and CVH (Model IV); Cov and grey matter volume (GMV); and Cov and grey matter volume residuals (GMVr) after controlling for the effects of CVH (see text). Grey circles denote uncorrected  $p > 0.05$ , circles without black outline denote uncorrected  $p < 0.05$  and circles with black outline denote FDR-adjusted  $p < 0.05$ .

1072

1073

1074 9. Supplementary Figures

1075

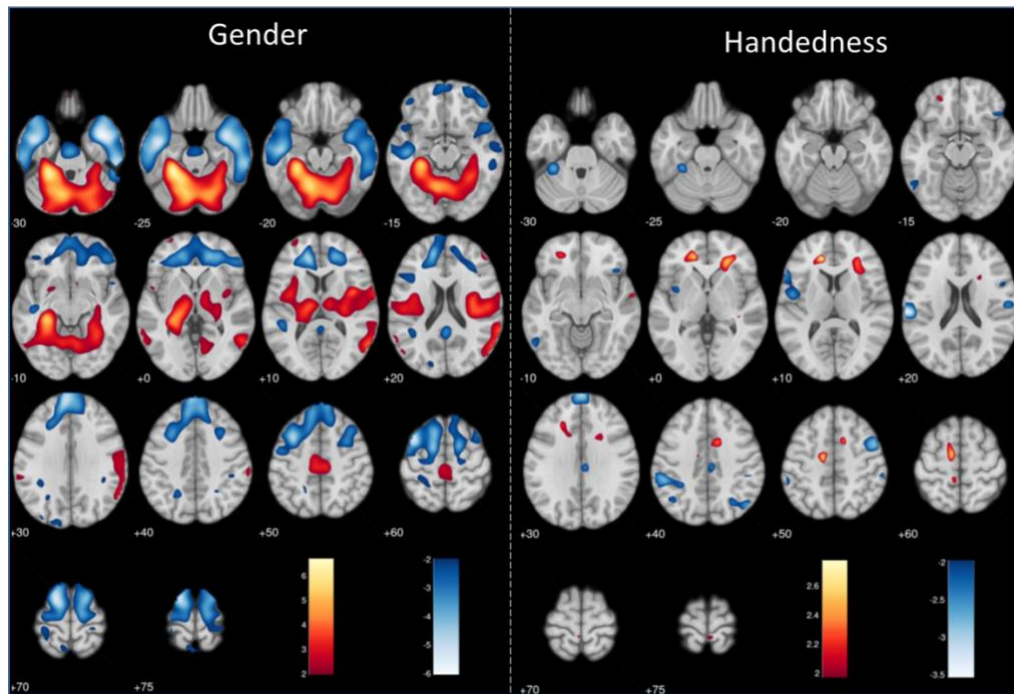

1076

1077 *Supplementary Figure 1. Voxel-wise associations between RSFA and covariates of no interests (gender – left panel*  
1078 *and handedness – right panel), Model I. Maps are thresholded at uncorrected p-values of 0.05 for more complete description*  
1079 *of the spatial representation.*

1080



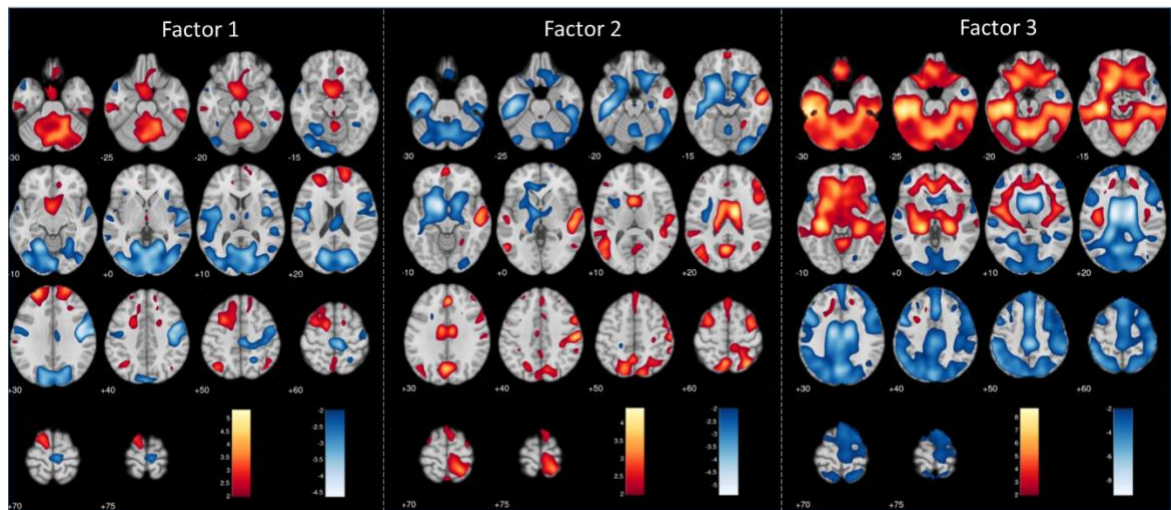

1081

1082

1083

*Supplementary Figure 2. Voxel-wise associations between RSFA and three factors of cardiovascular health (Model III). Maps are thresholded at uncorrected p-values of 0.05 for more complete description of the spatial representation.*

1084

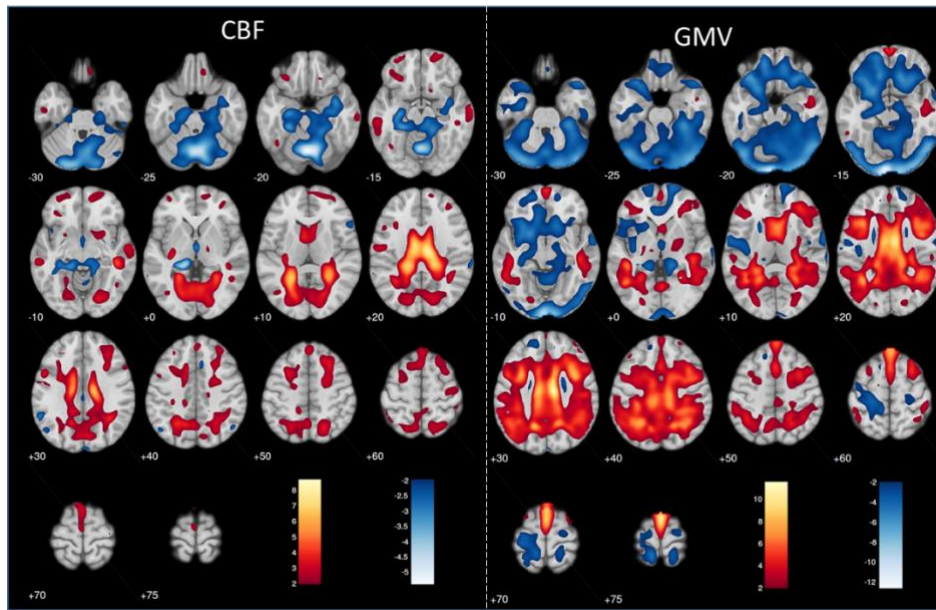

1085

1086

1087

*Supplementary Figure 3. Voxel-wise associations between RSFA and CBF (left panel, Model II) and GMV (right panel, Model V). Maps are thresholded at uncorrected p-values of 0.05 for more complete description of the spatial representation.*
